# Supplementary material for: Impacts of the Wetland Environment on Demographic Development During the Neolithic in the Lower Yangtze Region—Based on Peat and Archaeological Dates
Source: Frontiers journal article supplement (doi:10.3389/feart.2021.635640), 2021-03-09
Supplement: Table_1.XLSX [file Table_1.XLSX]

## Sheet: The lower Yangtze region
Table S1 Archaeological 14C database for the lower Yangtze region
Site name	Region	Province	Longitude (°E)	Latitude (°N)	Lab code	Material dated	14C age (yr BP)	1σ	Accepted/rejected	Reason for exclusion	Reference
Anxi	Taihu region	Zhejiang	120.021	30.4069	ZK-0044	Wood	4210	85			Institute of Archaeology, Chinese Academy of Social Sciences, 1991
Bianjiashan	Taihu region	Zhejiang	119.98	30.37	ZK-8225-2	Wood	3604	33			Institute of Archaeology, Chinese Academy of Social Sciences, 2009
Bianjiashan	Taihu region	Zhejiang	119.98	30.37	ZK-8228-7	Wood	4159	37			Institute of Archaeology, Chinese Academy of Social Sciences, 2009
Bianjiashan	Taihu region	Zhejiang	119.98	30.37	ZK-8228-11	Wood	4160	37			Institute of Archaeology, Chinese Academy of Social Sciences, 2009
Bianjiashan	Taihu region	Zhejiang	119.98	30.37	ZK-8228-10	Wood	4174	32			Institute of Archaeology, Chinese Academy of Social Sciences, 2009
Bianjiashan	Taihu region	Zhejiang	119.98	30.37	ZK-8228-2	Wood	4211	32			Institute of Archaeology, Chinese Academy of Social Sciences, 2009
Bianjiashan	Taihu region	Zhejiang	119.98	30.37	ZK-8228-8	Wood	4211	38			Institute of Archaeology, Chinese Academy of Social Sciences, 2009
Bianjiashan	Taihu region	Zhejiang	119.98	30.37	ZK-8228-3	Wood	4217	31			Institute of Archaeology, Chinese Academy of Social Sciences, 2009
Bianjiashan	Taihu region	Zhejiang	119.98	30.37	ZK-8228-6	Wood	4218	38			Institute of Archaeology, Chinese Academy of Social Sciences, 2009
Bianjiashan	Taihu region	Zhejiang	119.98	30.37	ZK-8228-9	Wood	4222	48			Institute of Archaeology, Chinese Academy of Social Sciences, 2009
Bianjiashan	Taihu region	Zhejiang	119.98	30.37	ZK-8228-4	Wood	4236	40			Institute of Archaeology, Chinese Academy of Social Sciences, 2009
Bianjiashan	Taihu region	Zhejiang	119.98	30.37	ZK-8225-1	Wood	4301	39			Institute of Archaeology, Chinese Academy of Social Sciences, 2009
Bianjiashan	Taihu region	Zhejiang	119.98	30.37	ZK-8225-3	Wood	4318	40			Institute of Archaeology, Chinese Academy of Social Sciences, 2009
Bianjiashan	Taihu region	Zhejiang	119.98	30.37	ZK-8221-5	Wood	4343	52			Institute of Archaeology, Chinese Academy of Social Sciences, 2009
Bianjiashan	Taihu region	Zhejiang	119.98	30.37	ZK-8230-2	Wood	4354	57			Institute of Archaeology, Chinese Academy of Social Sciences, 2009
Bianjiashan	Taihu region	Zhejiang	119.98	30.37	ZK-8221-3	Wood	4364	40			Institute of Archaeology, Chinese Academy of Social Sciences, 2009
Bianjiashan	Taihu region	Zhejiang	119.98	30.37	ZK-8221-1	Wood	4370	34			Institute of Archaeology, Chinese Academy of Social Sciences, 2009
Bianjiashan	Taihu region	Zhejiang	119.98	30.37	ZK-8228-5	Wood	4407	32			Institute of Archaeology, Chinese Academy of Social Sciences, 2009
Bianjiashan	Taihu region	Zhejiang	119.98	30.37	ZK-8221-4	Wood	4408	34			Institute of Archaeology, Chinese Academy of Social Sciences, 2009
Bianjiashan	Taihu region	Zhejiang	119.98	30.37	ZK-8230-1	Wood	4410	37			Institute of Archaeology, Chinese Academy of Social Sciences, 2009
Bianjiashan	Taihu region	Zhejiang	119.98	30.37	ZK-8221-2	Wood	4430	47			Institute of Archaeology, Chinese Academy of Social Sciences, 2009
Bianjiashan	Taihu region	Zhejiang	119.98	30.37	ZK-8228-1	Wood	4443	34			Institute of Archaeology, Chinese Academy of Social Sciences, 2009
Bianjiashan	Taihu region	Zhejiang	119.98	30.37	BA071289	Human bones	3520	70			Zhejiang Provincial Institute of Cultural Relics and Archaeology, 2019
Bianjiashan	Taihu region	Zhejiang	119.98	30.37	BA071288	Human head bones	3745	110			Zhejiang Provincial Institute of Cultural Relics and Archaeology, 2019
Bianjiashan	Taihu region	Zhejiang	119.98	30.37	BA07978	Bones	3930	55			Zhejiang Provincial Institute of Cultural Relics and Archaeology, 2019
Bianjiashan	Taihu region	Zhejiang	119.98	30.37	BA07972	Bones	4005	40			Zhejiang Provincial Institute of Cultural Relics and Archaeology, 2019
Bianjiashan	Taihu region	Zhejiang	119.98	30.37	BA07748	Rice	4010	35			Zhejiang Provincial Institute of Cultural Relics and Archaeology, 2019
Bianjiashan	Taihu region	Zhejiang	119.98	30.37	BA07973	Bones	4010	35			Zhejiang Provincial Institute of Cultural Relics and Archaeology, 2019
Bianjiashan	Taihu region	Zhejiang	119.98	30.37	BA07989	Bones	4015	40			Zhejiang Provincial Institute of Cultural Relics and Archaeology, 2019
Bianjiashan	Taihu region	Zhejiang	119.98	30.37	IA4A-72844	Ash	4030	40			Zhejiang Provincial Institute of Cultural Relics and Archaeology, 2019
Bianjiashan	Taihu region	Zhejiang	119.98	30.37	BA07991	Bones	4045	40			Zhejiang Provincial Institute of Cultural Relics and Archaeology, 2019
Bianjiashan	Taihu region	Zhejiang	119.98	30.37	BA07974	Bones	4070	40			Zhejiang Provincial Institute of Cultural Relics and Archaeology, 2019
Bianjiashan	Taihu region	Zhejiang	119.98	30.37	BA07975	Bones	4075	40			Zhejiang Provincial Institute of Cultural Relics and Archaeology, 2019
Bianjiashan	Taihu region	Zhejiang	119.98	30.37	BA07977	Bones	4075	35			Zhejiang Provincial Institute of Cultural Relics and Archaeology, 2019
Bianjiashan	Taihu region	Zhejiang	119.98	30.37	BA07988	Bones	4075	40			Zhejiang Provincial Institute of Cultural Relics and Archaeology, 2019
Bianjiashan	Taihu region	Zhejiang	119.98	30.37	BA07756	Melon seeds	4095	70			Zhejiang Provincial Institute of Cultural Relics and Archaeology, 2019
Bianjiashan	Taihu region	Zhejiang	119.98	30.37	IAAA-72911	Braided fabric	4100	30			Zhejiang Provincial Institute of Cultural Relics and Archaeology, 2019
Bianjiashan	Taihu region	Zhejiang	119.98	30.37	TKa-17091	Human bones	4125	20			Zhejiang Provincial Institute of Cultural Relics and Archaeology, 2019
Bianjiashan	Taihu region	Zhejiang	119.98	30.37	TKa-17981	Human bones	4128	21			Zhejiang Provincial Institute of Cultural Relics and Archaeology, 2019
Bianjiashan	Taihu region	Zhejiang	119.98	30.37	BA07754	Gourd seeds	4130	40			Zhejiang Provincial Institute of Cultural Relics and Archaeology, 2019
Bianjiashan	Taihu region	Zhejiang	119.98	30.37	BA07986	Bones	4130	40			Zhejiang Provincial Institute of Cultural Relics and Archaeology, 2019
Bianjiashan	Taihu region	Zhejiang	119.98	30.37	BA07992	Charcoal	4130	55			Zhejiang Provincial Institute of Cultural Relics and Archaeology, 2019
Bianjiashan	Taihu region	Zhejiang	119.98	30.37	NUTA2-16510	Ash	4133	32			Zhejiang Provincial Institute of Cultural Relics and Archaeology, 2019
Bianjiashan	Taihu region	Zhejiang	119.98	30.37	BA07970	Bones	4135	40			Zhejiang Provincial Institute of Cultural Relics and Archaeology, 2019
Bianjiashan	Taihu region	Zhejiang	119.98	30.37	NUTA2-16509	Seeds	4135	32			Zhejiang Provincial Institute of Cultural Relics and Archaeology, 2019
Bianjiashan	Taihu region	Zhejiang	119.98	30.37	BA07980	Bones	4140	40			Zhejiang Provincial Institute of Cultural Relics and Archaeology, 2019
Bianjiashan	Taihu region	Zhejiang	119.98	30.37	NUTA2-16512	Seeds	4142	33			Zhejiang Provincial Institute of Cultural Relics and Archaeology, 2019
Bianjiashan	Taihu region	Zhejiang	119.98	30.37	BA07750	Rice	4145	35			Zhejiang Provincial Institute of Cultural Relics and Archaeology, 2019
Bianjiashan	Taihu region	Zhejiang	119.98	30.37	TKa-16798	Human bones	4146	24			Zhejiang Provincial Institute of Cultural Relics and Archaeology, 2019
Bianjiashan	Taihu region	Zhejiang	119.98	30.37	TKa-16803	Human bones	4149	25			Zhejiang Provincial Institute of Cultural Relics and Archaeology, 2019
Bianjiashan	Taihu region	Zhejiang	119.98	30.37	BA07755	Rice	4150	55			Zhejiang Provincial Institute of Cultural Relics and Archaeology, 2019
Bianjiashan	Taihu region	Zhejiang	119.98	30.37	IAAA-72912	Ash	4150	30			Zhejiang Provincial Institute of Cultural Relics and Archaeology, 2019
Bianjiashan	Taihu region	Zhejiang	119.98	30.37	BA07757	Choerospondias axillaris	4155	35			Zhejiang Provincial Institute of Cultural Relics and Archaeology, 2019
Bianjiashan	Taihu region	Zhejiang	119.98	30.37	TKa-16807	Human bones	4157	24			Zhejiang Provincial Institute of Cultural Relics and Archaeology, 2019
Bianjiashan	Taihu region	Zhejiang	119.98	30.37	TKa-16812	Human bones	4158	24			Zhejiang Provincial Institute of Cultural Relics and Archaeology, 2019
Bianjiashan	Taihu region	Zhejiang	119.98	30.37	BA07982	Bones	4160	40			Zhejiang Provincial Institute of Cultural Relics and Archaeology, 2019
Bianjiashan	Taihu region	Zhejiang	119.98	30.37	BA07990	Bones	4160	40			Zhejiang Provincial Institute of Cultural Relics and Archaeology, 2019
Bianjiashan	Taihu region	Zhejiang	119.98	30.37	TKa-16806	Human bones	4161	25			Zhejiang Provincial Institute of Cultural Relics and Archaeology, 2019
Bianjiashan	Taihu region	Zhejiang	119.98	30.37	TKa-16808	Human bones	4162	37			Zhejiang Provincial Institute of Cultural Relics and Archaeology, 2019
Bianjiashan	Taihu region	Zhejiang	119.98	30.37	TKa-17967	Human bones	4164	21			Zhejiang Provincial Institute of Cultural Relics and Archaeology, 2019
Bianjiashan	Taihu region	Zhejiang	119.98	30.37	BA07983	Bones	4165	35			Zhejiang Provincial Institute of Cultural Relics and Archaeology, 2019
Bianjiashan	Taihu region	Zhejiang	119.98	30.37	TKa-16855	Human bones	4168	25			Zhejiang Provincial Institute of Cultural Relics and Archaeology, 2019
Bianjiashan	Taihu region	Zhejiang	119.98	30.37	TKa-16910	Human bones	4168	24			Zhejiang Provincial Institute of Cultural Relics and Archaeology, 2019
Bianjiashan	Taihu region	Zhejiang	119.98	30.37	TKa-16856	Human bones	4174	25			Zhejiang Provincial Institute of Cultural Relics and Archaeology, 2019
Bianjiashan	Taihu region	Zhejiang	119.98	30.37	TKa-16918	Human bones	4178	18			Zhejiang Provincial Institute of Cultural Relics and Archaeology, 2019
Bianjiashan	Taihu region	Zhejiang	119.98	30.37	TKa-17089	Human bones	4179	21			Zhejiang Provincial Institute of Cultural Relics and Archaeology, 2019
Bianjiashan	Taihu region	Zhejiang	119.98	30.37	TKa-16805	Human bones	4180	24			Zhejiang Provincial Institute of Cultural Relics and Archaeology, 2019
Bianjiashan	Taihu region	Zhejiang	119.98	30.37	TKa-16809	Human bones	4181	32			Zhejiang Provincial Institute of Cultural Relics and Archaeology, 2019
Bianjiashan	Taihu region	Zhejiang	119.98	30.37	TKa-16911	Human bones	4185	25			Zhejiang Provincial Institute of Cultural Relics and Archaeology, 2019
Bianjiashan	Taihu region	Zhejiang	119.98	30.37	TKa-17980	Human bones	4185	20			Zhejiang Provincial Institute of Cultural Relics and Archaeology, 2019
Bianjiashan	Taihu region	Zhejiang	119.98	30.37	TKa-16797	Human bones	4188	24			Zhejiang Provincial Institute of Cultural Relics and Archaeology, 2019
Bianjiashan	Taihu region	Zhejiang	119.98	30.37	TKa-16857	Human bones	4188	25			Zhejiang Provincial Institute of Cultural Relics and Archaeology, 2019
Bianjiashan	Taihu region	Zhejiang	119.98	30.37	TKa-17979	Human bones	4188	21			Zhejiang Provincial Institute of Cultural Relics and Archaeology, 2019
Bianjiashan	Taihu region	Zhejiang	119.98	30.37	TKa-16801	Human bones	4194	24			Zhejiang Provincial Institute of Cultural Relics and Archaeology, 2019
Bianjiashan	Taihu region	Zhejiang	119.98	30.37	IAAA-72845	Wood	4200	40			Zhejiang Provincial Institute of Cultural Relics and Archaeology, 2019
Bianjiashan	Taihu region	Zhejiang	119.98	30.37	NUTA2-16502	Ash	4206	31			Zhejiang Provincial Institute of Cultural Relics and Archaeology, 2019
Bianjiashan	Taihu region	Zhejiang	119.98	30.37	TKa-1681()	Human bones	4211	23			Zhejiang Provincial Institute of Cultural Relics and Archaeology, 2019
Bianjiashan	Taihu region	Zhejiang	119.98	30.37	TKa-16799	Human bones	4212	24			Zhejiang Provincial Institute of Cultural Relics and Archaeology, 2019
Bianjiashan	Taihu region	Zhejiang	119.98	30.37	TKa-16854	Human bones	4214	25			Zhejiang Provincial Institute of Cultural Relics and Archaeology, 2019
Bianjiashan	Taihu region	Zhejiang	119.98	30.37	BA07751	Melon seeds	4220	35			Zhejiang Provincial Institute of Cultural Relics and Archaeology, 2019
Bianjiashan	Taihu region	Zhejiang	119.98	30.37	BA07753	Rice	4220	35			Zhejiang Provincial Institute of Cultural Relics and Archaeology, 2019
Bianjiashan	Taihu region	Zhejiang	119.98	30.37	TKa-17088	Human bones	4221	27			Zhejiang Provincial Institute of Cultural Relics and Archaeology, 2019
Bianjiashan	Taihu region	Zhejiang	119.98	30.37	TKa-17982	Human bones	4223	20			Zhejiang Provincial Institute of Cultural Relics and Archaeology, 2019
Bianjiashan	Taihu region	Zhejiang	119.98	30.37	BA07752	Melon seeds	4235	55			Zhejiang Provincial Institute of Cultural Relics and Archaeology, 2019
Bianjiashan	Taihu region	Zhejiang	119.98	30.37	TKa-17968	Human bones	4238	20			Zhejiang Provincial Institute of Cultural Relics and Archaeology, 2019
Bianjiashan	Taihu region	Zhejiang	119.98	30.37	TKa-17092	Human bones	4243	20			Zhejiang Provincial Institute of Cultural Relics and Archaeology, 2019
Bianjiashan	Taihu region	Zhejiang	119.98	30.37	BA07971	Bones	4245	40			Zhejiang Provincial Institute of Cultural Relics and Archaeology, 2019
Bianjiashan	Taihu region	Zhejiang	119.98	30.37	BA07985	Bones	4250	40			Zhejiang Provincial Institute of Cultural Relics and Archaeology, 2019
Bianjiashan	Taihu region	Zhejiang	119.98	30.37	TKa-16802	Human bones	4250	25			Zhejiang Provincial Institute of Cultural Relics and Archaeology, 2019
Bianjiashan	Taihu region	Zhejiang	119.98	30.37	BA07976	Bones	4255	40			Zhejiang Provincial Institute of Cultural Relics and Archaeology, 2019
Bianjiashan	Taihu region	Zhejiang	119.98	30.37	TKa-17086	Human bones	4258	21			Zhejiang Provincial Institute of Cultural Relics and Archaeology, 2019
Bianjiashan	Taihu region	Zhejiang	119.98	30.37	TKa-16800	Human bones	4259	24			Zhejiang Provincial Institute of Cultural Relics and Archaeology, 2019
Bianjiashan	Taihu region	Zhejiang	119.98	30.37	BA07749	Water chestnut	4265	35			Zhejiang Provincial Institute of Cultural Relics and Archaeology, 2019
Bianjiashan	Taihu region	Zhejiang	119.98	30.37	BA07987	Bones	4265	55			Zhejiang Provincial Institute of Cultural Relics and Archaeology, 2019
Bianjiashan	Taihu region	Zhejiang	119.98	30.37	BA07981	Bones	4275	40			Zhejiang Provincial Institute of Cultural Relics and Archaeology, 2019
Bianjiashan	Taihu region	Zhejiang	119.98	30.37	BA07984	Bones	4275	40			Zhejiang Provincial Institute of Cultural Relics and Archaeology, 2019
Bianjiashan	Taihu region	Zhejiang	119.98	30.37	TKa-16804	Human bones	4284	25			Zhejiang Provincial Institute of Cultural Relics and Archaeology, 2019
Bianjiashan	Taihu region	Zhejiang	119.98	30.37	TKa-17087	Human bones	4294	20			Zhejiang Provincial Institute of Cultural Relics and Archaeology, 2019
Bianjiashan	Taihu region	Zhejiang	119.98	30.37	NUTA2-16449	Wood	4306	31			Zhejiang Provincial Institute of Cultural Relics and Archaeology, 2019
Bianjiashan	Taihu region	Zhejiang	119.98	30.37	TKa-17090	Human bones	4358	20			Zhejiang Provincial Institute of Cultural Relics and Archaeology, 2019
Bianjiashan	Taihu region	Zhejiang	119.98	30.37	TKa-16811	Human bones	4364	25			Zhejiang Provincial Institute of Cultural Relics and Archaeology, 2019
Bianjiashan	Taihu region	Zhejiang	119.98	30.37	BA07969	Shell	4385	40			Zhejiang Provincial Institute of Cultural Relics and Archaeology, 2019
Bianjiashan	Taihu region	Zhejiang	119.98	30.37	NETA2-16446	Wood	4427	31			Zhejiang Provincial Institute of Cultural Relics and Archaeology, 2019
Caoxieshan	Taihu region	Jiangsu	120.798	31.3739	ZK-0202	Charcoal	5210	105			Institute of Archaeology, Chinese Academy of Social Sciences, 1991
Caoxieshan	Taihu region	Jiangsu	120.798	31.3739	BK76022	Charred wood	5220	110			Institute of Archaeology, Chinese Academy of Social Sciences, 1991
Caoxieshan	Taihu region	Jiangsu	120.798	31.3739	ZK-0201	Charred wood	5460	115			Institute of Archaeology, Chinese Academy of Social Sciences, 1991
Chuodun	Taihu region	Jiangsu	120.85	31.38	ZK-3140	Wood	4084	54			Institute of Archaeology, Chinese Academy of Social Sciences, 2003
Chuodun	Taihu region	Jiangsu	120.85	31.38	ZK-3139	Wood	4306	48			Institute of Archaeology, Chinese Academy of Social Sciences, 2003
Chuodun	Taihu region	Jiangsu	120.85	31.38	Unknown	Soil organic matter	3058	176	Rejected	Dated on inappropriate materials	Cao et al., 2007
Chuodun	Taihu region	Jiangsu	120.85	31.38	Unknown	Soil organic matter	5450	147	Rejected	Dated on inappropriate materials	Cao et al., 2007
Chuodun	Taihu region	Jiangsu	120.85	31.38	Unknown	Carbonized rice grains	5123	45			Cao et al., 2007
Cuimuqiao	Taihu region	Zhejiang	120.767	30.75	ZK-0242	Wood	3830	95			Institute of Archaeology, Chinese Academy of Social Sciences, 1991
Dongshancun	Taihu region	Jiangsu	120.4	31.93	GZ4456	Ash	2845	30	Rejected	Mismatch with the culture larer	Li, 2011
Dongshancun	Taihu region	Jiangsu	120.4	31.93	BK90151	Charred wood	5060	70			Radiocarbon laboratory of Peking University, 1996
Dongshancun	Taihu region	Jiangsu	120.4	31.93	BK90146	Charred wood	5085	60			Radiocarbon laboratory of Peking University, 1996
Dongshancun	Taihu region	Jiangsu	120.4	31.93	GZ3920	Charcoal	5111	34			Li, 2011
Dongshancun	Taihu region	Jiangsu	120.4	31.93	GZ3917	Fruit	5125	29			Li, 2011
Dongshancun	Taihu region	Jiangsu	120.4	31.93	GZ3919	Charcoal	5137	28			Li, 2011
Dongshancun	Taihu region	Jiangsu	120.4	31.93	GZ3918	Charred rice	5139	33			Li, 2011
Dongshancun	Taihu region	Jiangsu	120.4	31.93	BK90150	Charred wood	5165	60			Radiocarbon laboratory of Peking University, 1996
Dongshancun	Taihu region	Jiangsu	120.4	31.93	BK90147	Charred wood	5425	120			Radiocarbon laboratory of Peking University, 1996
Dongshancun	Taihu region	Jiangsu	120.4	31.93	BK90148	Charred bones, Charred wood	5885	130			Radiocarbon laboratory of Peking University, 1996
Dongshancun	Taihu region	Jiangsu	120.4	31.93	GZ4457	Charcoal	6250	45	Rejected	Mismatch with the culture larer	Li, 2011
Dongshancun	Taihu region	Jiangsu	120.4	31.93	GZ4458	Mud	6350	35	Rejected	Dated on inappropriate materials	Li, 2011
Dongshancun	Taihu region	Jiangsu	120.4	31.93	GZ4459	Mud	6595	35	Rejected	Dated on inappropriate materials	Li, 2011
Dongyuan	Taihu region	Jiangsu	119.717	33.6725	ZK-3056	Charred wood	4516	60			Institute of Archaeology, Chinese Academy of Social Sciences, 2000
Dongyuan	Taihu region	Jiangsu	119.717	33.6725	ZK-3055	Charred wood	4610	60			Institute of Archaeology, Chinese Academy of Social Sciences, 2000
Fanshan	Taihu region	Zhejiang	119.992	30.4011	BA170926	Plant	4305	35			Zhejiang Provincial Institute of Cultural Relics and Archaeology, 2019
Fanshan	Taihu region	Zhejiang	119.992	30.4011	BA170927	Plant	4400	30			Zhejiang Provincial Institute of Cultural Relics and Archaeology, 2019
Fanshan	Taihu region	Zhejiang	119.992	30.4011	BA170924	Plant	4500	25			Zhejiang Provincial Institute of Cultural Relics and Archaeology, 2019
Fanshan	Taihu region	Zhejiang	119.992	30.4011	BA170920	Plant	4910	25			Zhejiang Provincial Institute of Cultural Relics and Archaeology, 2019
Fuquanshan	Taihu region	Shanghai	121.172	31.2093	ZK-1250	Charred wood	4600	80			Institute of Archaeology, Chinese Academy of Social Sciences, 1991
Fuquanshan	Taihu region	Shanghai	121.172	31.2093	ZK-1318	Wood	4810	80			Institute of Archaeology, Chinese Academy of Social Sciences, 1991
Fuquanshan	Taihu region	Shanghai	121.172	31.2093	ZK-1251	Charred wood	4870	80			Institute of Archaeology, Chinese Academy of Social Sciences, 1991
Ganggongling	Taihu region	Zhejiang	119.97	30.431	BA10533	Grasses	4305	35			Liu et al., 2017
Ganggongling	Taihu region	Zhejiang	119.97	30.431	BA10733	Grasses	4420	40			Liu et al., 2017
Ganggongling	Taihu region	Zhejiang	119.97	30.431	BA10732	Grasses	4430	35			Liu et al., 2017
Guangfucun	Taihu region	Jiangsu	121.168	31.1387	BK94092	Unknown	5410	80	Rejected	Dated on unknown materials	Suzhou Museum, 2001
Guangfulin	Taihu region	Shanghai	121.183	31.2833	Unknown	Walnut, Gourd seeds, Rice	3555	25			Shanghai Museum, 2014
Guangfulin	Taihu region	Shanghai	121.183	31.2833	Unknown	Walnut, Gourd seeds, Rice	3635	25			Shanghai Museum, 2014
Guangfulin	Taihu region	Shanghai	121.183	31.2833	Unknown	Walnut, Gourd seeds, Rice	3665	25			Shanghai Museum, 2014
Guangfulin	Taihu region	Shanghai	121.183	31.2833	Unknown	Walnut, Gourd seeds, Rice	3730	25			Shanghai Museum, 2014
Guangfulin	Taihu region	Shanghai	121.183	31.2833	BA20003	Unknown	3770	60	Rejected	Dated on unknown materials	Shanghai Museum, 2014
Guangfulin	Taihu region	Shanghai	121.183	31.2833	BA20004	Unknown	3780	60	Rejected	Dated on unknown materials	Shanghai Museum, 2014
Guangfulin	Taihu region	Shanghai	121.183	31.2833	Unknown	Charcoal	4110	40			Shanghai Museum, 2014
Guangfulin	Taihu region	Shanghai	121.183	31.2833	Unknown	Charcoal	4600	40			Shanghai Museum, 2014
Guangfulin	Taihu region	Shanghai	121.183	31.2833	XA4802	Organic-rich mud	4019	29	Rejected	Dated on inappropriate materials	Tang et al., 2019
Guangfulin	Taihu region	Shanghai	121.183	31.2833	XA4803	Organic-rich mud	4111	29	Rejected	Dated on inappropriate materials	Tang et al., 2019
Guanshan	Taihu region	Zhejiang	119.973	30.406	BA170908	Grasses	4265	35			Liu et al., 2017
Guoyuancun	Taihu region	Shanghai	121.183	31.2833	ZK-0292	Wood	3960	100			Institute of Archaeology, Chinese Academy of Social Sciences, 1991
Huishan	Taihu region	Zhejiang	120.162	30.6441	ZK-2109	Wood	3630	75			Institute of Archaeology, Chinese Academy of Social Sciences, 1991
Jiangli	Taihu region	Jiangsu	120.927	31.2531	BA111367	Charcoal	4445	30			Qiu et al., 2014
Jiangli	Taihu region	Jiangsu	120.927	31.2531	BA111366	Charred rice grain	4510	30			Qiu et al., 2014
Jiangli	Taihu region	Jiangsu	120.927	31.2531	BA121676	Charred rice grain	4700	30			Qiu et al., 2014
Jiangli	Taihu region	Jiangsu	120.927	31.2531	BA121677	Seeds of Polygonum aviculare	4810	30			Qiu et al., 2014
Jiangli	Taihu region	Jiangsu	120.927	31.2531	Jiangli	Bulk sample	5030	30	Rejected	Dated on inappropriate materials	Gao, 2012
Jiangli	Taihu region	Jiangsu	120.927	31.2531	Jiangli-1	Bulk sample	5790	30	Rejected	Dated on inappropriate materials	Gao, 2012
Jintanlianshan	Taihu region	Jiangsu	119.364	31.7014	ZK-2698	Wood	3531	111			Institute of Archaeology, Chinese Academy of Social Sciences, 1995
Jintansanxingcun	Taihu region	Jiangsu	119.495	31.6809	ZK-2837	Human bones	4219	111			Institute of Archaeology, Chinese Academy of Social Sciences, 1996
Jintansanxingcun	Taihu region	Jiangsu	119.495	31.6809	ZK-2838	Human bones	5013	83			Institute of Archaeology, Chinese Academy of Social Sciences, 1996
Laohuling	Taihu region	Zhejiang	119.97	30.431	BA120588	Leaves	4060	35			Liu et al., 2017
Laohuling	Taihu region	Zhejiang	119.97	30.431	BA120587	Grasses	4215	35			Liu et al., 2017
Laohuling	Taihu region	Zhejiang	119.97	30.431	BA120589	Grasses	4290	25			Liu et al., 2017
Laohuling	Taihu region	Zhejiang	119.97	30.431	BA170910	Grasses	4475	35			Liu et al., 2017
Liangzhu	Taihu region	Zhejiang	119.989	30.4013	BA08914	Ash on pottery	3910	32			Zhejiang Provincial Institute of Cultural Relics and Archaeology, 2019
Liangzhu	Taihu region	Zhejiang	119.989	30.4013	BA08912	Ash on pottery	3920	28			Zhejiang Provincial Institute of Cultural Relics and Archaeology, 2019
Liangzhu	Taihu region	Zhejiang	119.989	30.4013	BA08911	Ash on pottery	3950	35			Zhejiang Provincial Institute of Cultural Relics and Archaeology, 2019
Liangzhu	Taihu region	Zhejiang	119.989	30.4013	BA08913	Ash on pottery	3970	36			Zhejiang Provincial Institute of Cultural Relics and Archaeology, 2019
Liangzhu	Taihu region	Zhejiang	119.989	30.4013	BA08915	Ash on pottery	3990	35			Zhejiang Provincial Institute of Cultural Relics and Archaeology, 2019
Liangzhu	Taihu region	Zhejiang	119.989	30.4013	BA071001	Charcoal	4115	40			Zhejiang Provincial Institute of Cultural Relics and Archaeology, 2019
Liangzhu	Taihu region	Zhejiang	119.989	30.4013	BA08931	Plant fragments	3815	27			Zhejiang Provincial Institute of Cultural Relics and Archaeology, 2019
Liangzhu	Taihu region	Zhejiang	119.989	30.4013	BA08921	Ash on pottery	3860	25			Zhejiang Provincial Institute of Cultural Relics and Archaeology, 2019
Liangzhu	Taihu region	Zhejiang	119.989	30.4013	BA08930	Rice	3875	31			Zhejiang Provincial Institute of Cultural Relics and Archaeology, 2019
Liangzhu	Taihu region	Zhejiang	119.989	30.4013	BA08929	Spikelet of rice	3910	30			Zhejiang Provincial Institute of Cultural Relics and Archaeology, 2019
Liangzhu	Taihu region	Zhejiang	119.989	30.4013	BA08920	Ash on pottery	3935	26			Zhejiang Provincial Institute of Cultural Relics and Archaeology, 2019
Liangzhu	Taihu region	Zhejiang	119.989	30.4013	BA08918	Ash on pottery	3965	28			Zhejiang Provincial Institute of Cultural Relics and Archaeology, 2019
Liangzhu	Taihu region	Zhejiang	119.989	30.4013	BA08922	Ash on pottery	3995	23			Zhejiang Provincial Institute of Cultural Relics and Archaeology, 2019
Liangzhu	Taihu region	Zhejiang	119.989	30.4013	BA08924	Ash on pottery	4000	36			Zhejiang Provincial Institute of Cultural Relics and Archaeology, 2019
Liangzhu	Taihu region	Zhejiang	119.989	30.4013	BA08917	Ash on pottery	4010	28			Zhejiang Provincial Institute of Cultural Relics and Archaeology, 2019
Liangzhu	Taihu region	Zhejiang	119.989	30.4013	BA08925	Ash on pottery	4020	22			Zhejiang Provincial Institute of Cultural Relics and Archaeology, 2019
Liangzhu	Taihu region	Zhejiang	119.989	30.4013	BA08919	Ash on pottery	4060	23			Zhejiang Provincial Institute of Cultural Relics and Archaeology, 2019
Liangzhu	Taihu region	Zhejiang	119.989	30.4013	BA08933	Neem seeds	4065	25			Zhejiang Provincial Institute of Cultural Relics and Archaeology, 2019
Liangzhu	Taihu region	Zhejiang	119.989	30.4013	BA08927	Ash on pottery	4070	32			Zhejiang Provincial Institute of Cultural Relics and Archaeology, 2019
Liangzhu	Taihu region	Zhejiang	119.989	30.4013	BA08923	Ash on pottery	4075	24			Zhejiang Provincial Institute of Cultural Relics and Archaeology, 2019
Liangzhu	Taihu region	Zhejiang	119.989	30.4013	BA08928	Spikelet of rice	4100	31			Zhejiang Provincial Institute of Cultural Relics and Archaeology, 2019
Liangzhu	Taihu region	Zhejiang	119.989	30.4013	BA08926	Ash on pottery	4145	27			Zhejiang Provincial Institute of Cultural Relics and Archaeology, 2019
Liangzhu	Taihu region	Zhejiang	119.989	30.4013	TKa-17978	Human bones	4199	20			Zhejiang Provincial Institute of Cultural Relics and Archaeology, 2019
Liangzhu	Taihu region	Zhejiang	119.989	30.4013	TKa-17977	Human bones	4222	21			Zhejiang Provincial Institute of Cultural Relics and Archaeology, 2019
Liangzhu	Taihu region	Zhejiang	119.989	30.4013	BA08916	Ash on pottery	3920	27			Zhejiang Provincial Institute of Cultural Relics and Archaeology, 2019
Liangzhu	Taihu region	Zhejiang	119.989	30.4013	BA071017	Charred wood	3960	55			Zhejiang Provincial Institute of Cultural Relics and Archaeology, 2019
Liangzhu	Taihu region	Zhejiang	119.989	30.4013	BA071012	Charred wood	4070	35			Zhejiang Provincial Institute of Cultural Relics and Archaeology, 2019
Liangzhu	Taihu region	Zhejiang	119.989	30.4013	BA071010	Seeds	4100	50			Zhejiang Provincial Institute of Cultural Relics and Archaeology, 2019
Liangzhu	Taihu region	Zhejiang	119.989	30.4013	IAAA-72992	Ash	4110	40			Zhejiang Provincial Institute of Cultural Relics and Archaeology, 2019
Liangzhu	Taihu region	Zhejiang	119.989	30.4013	TKa-17971	Human bones	4114	23			Zhejiang Provincial Institute of Cultural Relics and Archaeology, 2019
Liangzhu	Taihu region	Zhejiang	119.989	30.4013	NUTA2-16511	Ash	4137	32			Zhejiang Provincial Institute of Cultural Relics and Archaeology, 2019
Liangzhu	Taihu region	Zhejiang	119.989	30.4013	TKa-17975	Human bones	4158	26			Zhejiang Provincial Institute of Cultural Relics and Archaeology, 2019
Liangzhu	Taihu region	Zhejiang	119.989	30.4013	BA071013	Charred wood	4165	40			Zhejiang Provincial Institute of Cultural Relics and Archaeology, 2019
Liangzhu	Taihu region	Zhejiang	119.989	30.4013	TKa-17973	Human bones	4189	20			Zhejiang Provincial Institute of Cultural Relics and Archaeology, 2019
Liangzhu	Taihu region	Zhejiang	119.989	30.4013	TKa-16908	Human bones	4198	18			Zhejiang Provincial Institute of Cultural Relics and Archaeology, 2019
Liangzhu	Taihu region	Zhejiang	119.989	30.4013	NUTA2-16506	Ash	4208	31			Zhejiang Provincial Institute of Cultural Relics and Archaeology, 2019
Liangzhu	Taihu region	Zhejiang	119.989	30.4013	TKa-16909	Human bones	4213	18			Zhejiang Provincial Institute of Cultural Relics and Archaeology, 2019
Liangzhu	Taihu region	Zhejiang	119.989	30.4013	TKa-17969	Human bones	4217	20			Zhejiang Provincial Institute of Cultural Relics and Archaeology, 2019
Liangzhu	Taihu region	Zhejiang	119.989	30.4013	IAAA-72838	Ash	4220	40			Zhejiang Provincial Institute of Cultural Relics and Archaeology, 2019
Liangzhu	Taihu region	Zhejiang	119.989	30.4013	TKa-17972	Human bones	4226	19			Zhejiang Provincial Institute of Cultural Relics and Archaeology, 2019
Liangzhu	Taihu region	Zhejiang	119.989	30.4013	BA071015	Charred wood	4230	40			Zhejiang Provincial Institute of Cultural Relics and Archaeology, 2019
Liangzhu	Taihu region	Zhejiang	119.989	30.4013	TKa-17974	Human bones	4233	26			Zhejiang Provincial Institute of Cultural Relics and Archaeology, 2019
Liangzhu	Taihu region	Zhejiang	119.989	30.4013	TKa-17970	Human bones	4239	25			Zhejiang Provincial Institute of Cultural Relics and Archaeology, 2019
Liangzhu	Taihu region	Zhejiang	119.989	30.4013	TKa-17428	Human bones	4244	43			Zhejiang Provincial Institute of Cultural Relics and Archaeology, 2019
Liangzhu	Taihu region	Zhejiang	119.989	30.4013	BA071014	Charred wood	4245	40			Zhejiang Provincial Institute of Cultural Relics and Archaeology, 2019
Liangzhu	Taihu region	Zhejiang	119.989	30.4013	TKa-17976	Human bones	4253	20			Zhejiang Provincial Institute of Cultural Relics and Archaeology, 2019
Liangzhu	Taihu region	Zhejiang	119.989	30.4013	NUTA2-16508	Ash	4258	34			Zhejiang Provincial Institute of Cultural Relics and Archaeology, 2019
Liangzhu	Taihu region	Zhejiang	119.989	30.4013	1AAA-72837	Ash	4270	40			Zhejiang Provincial Institute of Cultural Relics and Archaeology, 2019
Liangzhu	Taihu region	Zhejiang	119.989	30.4013	BA071016	Charred wood	4285	35			Zhejiang Provincial Institute of Cultural Relics and Archaeology, 2019
Liangzhu	Taihu region	Zhejiang	119.989	30.4013	XL-1	Wood	3880	40			Liu et al., 2015
Liangzhu	Taihu region	Zhejiang	119.989	30.4013	LZ1-1	Peat	4050	30	Rejected	Dated on inappropriate materials	Liu et al., 2015
Liangzhu	Taihu region	Zhejiang	119.989	30.4013	ZK-8348	Charred wood	4169	23			Institute of Archaeology, Chinese Academy of Social Sciences and Institute of Earth Environment,Chinese Academy of Sciences, 2011
Liangzhu	Taihu region	Zhejiang	119.989	30.4013	ZK-8346	Charred wood	4201	23			Institute of Archaeology, Chinese Academy of Social Sciences and Institute of Earth Environment,Chinese Academy of Sciences, 2011
Liangzhu	Taihu region	Zhejiang	119.989	30.4013	LZ1-2	Organic mud	4210	40	Rejected	Dated on inappropriate materials	Liu et al., 2015
Liangzhu	Taihu region	Zhejiang	119.989	30.4013	ZK-8347	Charred wood	4372	26			Institute of Archaeology, Chinese Academy of Social Sciences and Institute of Earth Environment,Chinese Academy of Sciences, 2011
Liangzhu	Taihu region	Zhejiang	119.989	30.4013	LZ1-5	Plant	4390	40			Liu et al., 2015
Liangzhu	Taihu region	Zhejiang	119.989	30.4013	*LZ1-3	Charcoal	4429	30			Liu et al., 2015
Liangzhu	Taihu region	Zhejiang	119.989	30.4013	LZ1-4	Peat	4520	40	Rejected	Dated on inappropriate materials	Liu et al., 2015
Liangzhu	Taihu region	Zhejiang	119.989	30.4013	*LZ2-1	Organic mud	4530	30	Rejected	Dated on inappropriate materials	Liu et al., 2015
Liangzhu	Taihu region	Zhejiang	119.989	30.4013	*LZ2-2	Organic mud	4965	35	Rejected	Dated on inappropriate materials	Liu et al., 2015
Liyushan	Taihu region	Zhejiang	119.973	30.406	BA120581	Bamboo	4130	40			Liu et al., 2017
Liyushan	Taihu region	Zhejiang	119.973	30.406	BA170904	Grasses	4285	30			Liu et al., 2017
Liyushan	Taihu region	Zhejiang	119.973	30.406	BA170905	Grasses	4305	30			Liu et al., 2017
Longnan	Taihu region	Zhejiang	120.596	30.9813	ZK-2271	Charred rice	4160	125			Institute of Archaeology, Chinese Academy of Social Sciences, 1991
Longnan	Taihu region	Zhejiang	120.596	30.9813	BK89024	Charred wood	4165	100			Yuan et al., 1994
Longnan	Taihu region	Zhejiang	120.596	30.9813	BK89026	Ash	4460	80			Yuan et al., 1994
Longnan	Taihu region	Zhejiang	120.596	30.9813	BK89025	Ash	4550	90			Yuan et al., 1994
Longnan	Taihu region	Zhejiang	120.596	30.9813	ZK-2276	Wood	4650	80			Institute of Archaeology, Chinese Academy of Social Sciences, 1991
Luojiajiao	Taihu region	Zhejiang	120.47	30.628	ZK-0860	Charred reeds	6080	130			Institute of Archaeology, Chinese Academy of Social Sciences, 1991
Luojiajiao	Taihu region	Zhejiang	120.47	30.628	BK80004	Charred reeds	6220	100			Institute of Archaeology, Chinese Academy of Social Sciences, 1991
Luotuodun	Taihu region	Jiangsu	119.706	31.3595	KF071204	Mud	5281	175	Rejected	Dated on inappropriate materials	Li et al., 2008
Luotuodun	Taihu region	Jiangsu	119.706	31.3595	KF071205	Peat	5464	165	Rejected	Dated on inappropriate materials	Li et al., 2008
Luotuodun	Taihu region	Jiangsu	119.706	31.3595	LEDL07-652	Mud	5473	36	Rejected	Dated on inappropriate materials	Li, 2011
Luotuodun	Taihu region	Jiangsu	119.706	31.3595	KF071206	Peat	6016	200	Rejected	Dated on inappropriate materials	Li et al., 2008
Maoshan	Taihu region	Zhejiang	120.272	30.437	BA121233	Peat	3980	35	Rejected	Dated on inappropriate materials	Jin et al., 2019
Maoshan	Taihu region	Zhejiang	120.272	30.437	BA121234	Charcoal	4125	25			Jin et al., 2019
Maoshan	Taihu region	Zhejiang	120.272	30.437	BA121235	Charcoal	4770	30			Jin et al., 2019
Maoshan	Taihu region	Zhejiang	120.272	30.437	BA121236	Charcoal	4980	35			Jin et al., 2019
Meirendi	Taihu region	Zhejiang	120.006	30.4025	BAI 11579	Charcoal	3960	25			Zhejiang Provincial Institute of Cultural Relics and Archaeology, 2019
Meirendi	Taihu region	Zhejiang	120.006	30.4025	BA 111578	Charred rice	4050	25			Zhejiang Provincial Institute of Cultural Relics and Archaeology, 2019
Meirendi	Taihu region	Zhejiang	120.006	30.4025	BAI 11577	Charred rice	4085	25			Zhejiang Provincial Institute of Cultural Relics and Archaeology, 2019
Meirendi	Taihu region	Zhejiang	120.006	30.4025	BA 10978	Choerospondias axillaris	4095	30			Zhejiang Provincial Institute of Cultural Relics and Archaeology, 2019
Meirendi	Taihu region	Zhejiang	120.006	30.4025	BA 10979	Diospyros lotus	4095	35			Zhejiang Provincial Institute of Cultural Relics and Archaeology, 2019
Meirendi	Taihu region	Zhejiang	120.006	30.4025	BA 10977	Seeds	4100	45			Zhejiang Provincial Institute of Cultural Relics and Archaeology, 2019
Meirendi	Taihu region	Zhejiang	120.006	30.4025	RA10973	Polygonaceae plants	4110	30			Zhejiang Provincial Institute of Cultural Relics and Archaeology, 2019
Meirendi	Taihu region	Zhejiang	120.006	30.4025	BA 10980	Rice	4125	25			Zhejiang Provincial Institute of Cultural Relics and Archaeology, 2019
Meirendi	Taihu region	Zhejiang	120.006	30.4025	BA 10983	Charred wood	4140	200			Zhejiang Provincial Institute of Cultural Relics and Archaeology, 2019
Meirendi	Taihu region	Zhejiang	120.006	30.4025	TKa-17275	Human bones	4167	20			Zhejiang Provincial Institute of Cultural Relics and Archaeology, 2019
Meirendi	Taihu region	Zhejiang	120.006	30.4025	TKa-17096	Human bones	4171	22			Zhejiang Provincial Institute of Cultural Relics and Archaeology, 2019
Meirendi	Taihu region	Zhejiang	120.006	30.4025	TKa-17097	Human bones	4174	20			Zhejiang Provincial Institute of Cultural Relics and Archaeology, 2019
Meirendi	Taihu region	Zhejiang	120.006	30.4025	BA 10982	Charred wood	4175	30			Zhejiang Provincial Institute of Cultural Relics and Archaeology, 2019
Meirendi	Taihu region	Zhejiang	120.006	30.4025	TKa-17274	Human bones	4180	19			Zhejiang Provincial Institute of Cultural Relics and Archaeology, 2019
Meirendi	Taihu region	Zhejiang	120.006	30.4025	TKa-17276	Human bones	4218	20			Zhejiang Provincial Institute of Cultural Relics and Archaeology, 2019
Meirendi	Taihu region	Zhejiang	120.006	30.4025	TKa-17095	Human bones	4222	20			Zhejiang Provincial Institute of Cultural Relics and Archaeology, 2019
Meirendi	Taihu region	Zhejiang	120.006	30.4025	TKa-17098	Human bones	4228	19			Zhejiang Provincial Institute of Cultural Relics and Archaeology, 2019
Meirendi	Taihu region	Zhejiang	120.006	30.4025	TKa-17094	Human bones	4230	20			Zhejiang Provincial Institute of Cultural Relics and Archaeology, 2019
Meirendi	Taihu region	Zhejiang	120.006	30.4025	TKa-17093	Human bones	4234	20			Zhejiang Provincial Institute of Cultural Relics and Archaeology, 2019
Miaoqian	Taihu region	Zhejiang	120.04	30.3791	ZK-2963	Wood	4137	54			Institute of Archaeology, Chinese Academy of Social Sciences, 1999
Miaoqian	Taihu region	Zhejiang	120.04	30.3791	ZK-2962	Wood	4184	61			Institute of Archaeology, Chinese Academy of Social Sciences, 1999
Mifenglong	Taihu region	Zhejiang	119.97	30.431	BA170915	Grasses	4340	35			Liu et al., 2017
Mifenglong	Taihu region	Zhejiang	119.97	30.431	BA170916	Grasses	4385	35			Liu et al., 2017
Mojiaoshan	Taihu region	Zhejiang	119.997	30.4	BA111580	Charred rice	4185	20			Zhejiang Provincial Institute of Cultural Relics and Archaeology, 2019
Mojiaoshan	Taihu region	Zhejiang	119.997	30.4	BA111581	Charred rice	4215	20			Zhejiang Provincial Institute of Cultural Relics and Archaeology, 2019
Mojiaoshan	Taihu region	Zhejiang	119.997	30.4	BA111584	Charred rice	4235	25			Zhejiang Provincial Institute of Cultural Relics and Archaeology, 2019
Mojiaoshan	Taihu region	Zhejiang	119.997	30.4	BA111582	Charred rice	4265	25			Zhejiang Provincial Institute of Cultural Relics and Archaeology, 2019
Mojiaoshan	Taihu region	Zhejiang	119.997	30.4	BA111589	Charred rice	4275	25			Zhejiang Provincial Institute of Cultural Relics and Archaeology, 2019
Mojiaoshan	Taihu region	Zhejiang	119.997	30.4	BA111586	Charred rice	4280	35			Zhejiang Provincial Institute of Cultural Relics and Archaeology, 2019
Mojiaoshan	Taihu region	Zhejiang	119.997	30.4	BA111590	Charred rice	4305	25			Zhejiang Provincial Institute of Cultural Relics and Archaeology, 2019
Mojiaoshan	Taihu region	Zhejiang	119.997	30.4	BA111588	Charred rice	4320	25			Zhejiang Provincial Institute of Cultural Relics and Archaeology, 2019
Mojiaoshan	Taihu region	Zhejiang	119.997	30.4	BA170917	Plant	4335	35			Zhejiang Provincial Institute of Cultural Relics and Archaeology, 2019
Mojiaoshan	Taihu region	Zhejiang	119.997	30.4	BA170958	Charred rice	4335	35			Zhejiang Provincial Institute of Cultural Relics and Archaeology, 2019
Mojiaoshan	Taihu region	Zhejiang	119.997	30.4	BA170918	Grass in mud	4355	25			Zhejiang Provincial Institute of Cultural Relics and Archaeology, 2019
Mojiaoshan	Taihu region	Zhejiang	119.997	30.4	BA111587	Charred rice	4385	30			Zhejiang Provincial Institute of Cultural Relics and Archaeology, 2019
Mojiaoshan	Taihu region	Zhejiang	119.997	30.4	BA111585	Charred rice	4400	30			Zhejiang Provincial Institute of Cultural Relics and Archaeology, 2019
Mojiaoshan	Taihu region	Zhejiang	119.997	30.4	BA111583	Charcoal	5845	25			Zhejiang Provincial Institute of Cultural Relics and Archaeology, 2019
Mojiaoshan	Taihu region	Zhejiang	119.997	30.4	LZ-N-4	pollen concentrates	3640	30	Rejected	Dated on inappropriate materials	Wang et al., 2017
Mojiaoshan	Taihu region	Zhejiang	119.997	30.4	LZ-N-3	pollen concentrates	3710	30	Rejected	Dated on inappropriate materials	Wang et al., 2017
Mojiaoshan	Taihu region	Zhejiang	119.997	30.4	LZ-N-8	charcoal	3960	30			Wang et al., 2017
Mojiaoshan	Taihu region	Zhejiang	119.997	30.4	LZ-N-10	charcoal	4060	30			Wang et al., 2017
Mojiaoshan	Taihu region	Zhejiang	119.997	30.4	LZ-W -1	charcoal	4060	30			Wang et al., 2017
Mojiaoshan	Taihu region	Zhejiang	119.997	30.4	LZ-N-7	charcoal	4080	30			Wang et al., 2017
Mojiaoshan	Taihu region	Zhejiang	119.997	30.4	LZ-N-6	pollen concentrates	4090	30	Rejected	Dated on inappropriate materials	Wang et al., 2017
Mojiaoshan	Taihu region	Zhejiang	119.997	30.4	LZ-N-9	charcoal	4140	30			Wang et al., 2017
Mojiaoshan	Taihu region	Zhejiang	119.997	30.4	LZ-W -2	plant	4400	30			Wang et al., 2017
Mojiaoshan	Taihu region	Zhejiang	119.997	30.4	LZ-N-5	pollen concentrates	4530	30	Rejected	Dated on inappropriate materials	Wang et al., 2017
Qiandixiang	Taihu region	Jiangsu	120.719	31.6913	ZK-2297	Charred wood	4300	100			Institute of Archaeology, Chinese Academy of Social Sciences, 1991
Qiandixiang	Taihu region	Jiangsu	120.719	31.6913	ZK-2296	Charred wood	4550	105			Institute of Archaeology, Chinese Academy of Social Sciences, 1991
Qianshanyang	Taihu region	Zhejiang	120.137	30.837	BA07729	Rice	3505	35			Cultural Relics and Archaeology Institute of Zhejiang Province and Huzhou Museum, 2014
Qianshanyang	Taihu region	Zhejiang	120.137	30.837	BA05751	Charred wood	3545	35			Cultural Relics and Archaeology Institute of Zhejiang Province and Huzhou Museum, 2014
Qianshanyang	Taihu region	Zhejiang	120.137	30.837	BA07734	Rice	3550	35			Cultural Relics and Archaeology Institute of Zhejiang Province and Huzhou Museum, 2014
Qianshanyang	Taihu region	Zhejiang	120.137	30.837	BA05752	Charred wood	3580	35			Cultural Relics and Archaeology Institute of Zhejiang Province and Huzhou Museum, 2014
Qianshanyang	Taihu region	Zhejiang	120.137	30.837	BA07735	Melon seeds	3580	55			Cultural Relics and Archaeology Institute of Zhejiang Province and Huzhou Museum, 2014
Qianshanyang	Taihu region	Zhejiang	120.137	30.837	IAAA-72839	Ash	3630	40			Cultural Relics and Archaeology Institute of Zhejiang Province and Huzhou Museum, 2014
Qianshanyang	Taihu region	Zhejiang	120.137	30.837	BA071027	Bones	3635	35			Cultural Relics and Archaeology Institute of Zhejiang Province and Huzhou Museum, 2014
Qianshanyang	Taihu region	Zhejiang	120.137	30.837	BA071031	Bamboo weaving material	3675	40			Cultural Relics and Archaeology Institute of Zhejiang Province and Huzhou Museum, 2014
Qianshanyang	Taihu region	Zhejiang	120.137	30.837	BA07724	Rice	3720	60			Cultural Relics and Archaeology Institute of Zhejiang Province and Huzhou Museum, 2014
Qianshanyang	Taihu region	Zhejiang	120.137	30.837	IAAA-72840	Ash	3750	40			Cultural Relics and Archaeology Institute of Zhejiang Province and Huzhou Museum, 2014
Qianshanyang	Taihu region	Zhejiang	120.137	30.837	BA05761	Bamboo	3755	35			Cultural Relics and Archaeology Institute of Zhejiang Province and Huzhou Museum, 2014
Qianshanyang	Taihu region	Zhejiang	120.137	30.837	BA05758	Charred wood	3770	35			Cultural Relics and Archaeology Institute of Zhejiang Province and Huzhou Museum, 2014
Qianshanyang	Taihu region	Zhejiang	120.137	30.837	BA05753	Charred wood	3775	35			Cultural Relics and Archaeology Institute of Zhejiang Province and Huzhou Museum, 2014
Qianshanyang	Taihu region	Zhejiang	120.137	30.837	BA05754	Charred wood	3780	40			Cultural Relics and Archaeology Institute of Zhejiang Province and Huzhou Museum, 2014
Qianshanyang	Taihu region	Zhejiang	120.137	30.837	BA05755	Charred wood	3780	45			Cultural Relics and Archaeology Institute of Zhejiang Province and Huzhou Museum, 2014
Qianshanyang	Taihu region	Zhejiang	120.137	30.837	BA05759	Charred wood	3795	35			Cultural Relics and Archaeology Institute of Zhejiang Province and Huzhou Museum, 2014
Qianshanyang	Taihu region	Zhejiang	120.137	30.837	BA071030	Tempered soil	3800	40			Cultural Relics and Archaeology Institute of Zhejiang Province and Huzhou Museum, 2014
Qianshanyang	Taihu region	Zhejiang	120.137	30.837	IAAA-72933	Ash	3800	40			Cultural Relics and Archaeology Institute of Zhejiang Province and Huzhou Museum, 2014
Qianshanyang	Taihu region	Zhejiang	120.137	30.837	BA05760	Wood	3815	35			Cultural Relics and Archaeology Institute of Zhejiang Province and Huzhou Museum, 2014
Qianshanyang	Taihu region	Zhejiang	120.137	30.837	BA05762	Bamboo	3820	35			Cultural Relics and Archaeology Institute of Zhejiang Province and Huzhou Museum, 2014
Qianshanyang	Taihu region	Zhejiang	120.137	30.837	BA071029	Bones	3820	35			Cultural Relics and Archaeology Institute of Zhejiang Province and Huzhou Museum, 2014
Qianshanyang	Taihu region	Zhejiang	120.137	30.837	BA07725	Hackberry seeds	3840	40			Cultural Relics and Archaeology Institute of Zhejiang Province and Huzhou Museum, 2014
Qianshanyang	Taihu region	Zhejiang	120.137	30.837	BA071026	Bones	3890	40			Cultural Relics and Archaeology Institute of Zhejiang Province and Huzhou Museum, 2014
Qianshanyang	Taihu region	Zhejiang	120.137	30.837	BA05756	Charred bamboo	3895	40			Cultural Relics and Archaeology Institute of Zhejiang Province and Huzhou Museum, 2014
Qianshanyang	Taihu region	Zhejiang	120.137	30.837	BA05757	Charred bamboo	3895	35			Cultural Relics and Archaeology Institute of Zhejiang Province and Huzhou Museum, 2014
Qianshanyang	Taihu region	Zhejiang	120.137	30.837	BA07728	Melon seeds	3905	75			Cultural Relics and Archaeology Institute of Zhejiang Province and Huzhou Museum, 2014
Qianshanyang	Taihu region	Zhejiang	120.137	30.837	BA071028	Bones	3910	40			Cultural Relics and Archaeology Institute of Zhejiang Province and Huzhou Museum, 2014
Qianshanyang	Taihu region	Zhejiang	120.137	30.837	BA07727	Plant fibre	3960	50			Cultural Relics and Archaeology Institute of Zhejiang Province and Huzhou Museum, 2014
Qianshanyang	Taihu region	Zhejiang	120.137	30.837	BA07738	Rice husk	4015	50			Cultural Relics and Archaeology Institute of Zhejiang Province and Huzhou Museum, 2014
Qianshanyang	Taihu region	Zhejiang	120.137	30.837	ZK-0050	Bamboo rope	4020	85			Institute of Archaeology, Chinese Academy of Social Sciences, 1991
Qianshanyang	Taihu region	Zhejiang	120.137	30.837	BA07726	Melon seeds	4060	70			Cultural Relics and Archaeology Institute of Zhejiang Province and Huzhou Museum, 2014
Qianshanyang	Taihu region	Zhejiang	120.137	30.837	ZK-0047	Scoop	4120	85			Institute of Archaeology, Chinese Academy of Social Sciences, 1991
Qianshanyang	Taihu region	Zhejiang	120.137	30.837	ZK-0097	Wood pestle	4560	90			Institute of Archaeology, Chinese Academy of Social Sciences, 1991
Qianshanyang	Taihu region	Zhejiang	120.137	30.837	ZK-0049	Charred rice	4570	100			Institute of Archaeology, Chinese Academy of Social Sciences, 1991
Qingdun	Taihu region	Jiangsu	120.254	32.6085	SH-0006	Ash	4450	80			Institute of Archaeology, Chinese Academy of Social Sciences, 1991
Qingdun	Taihu region	Jiangsu	120.254	32.6085	WB78-08	Charred wood	4550	85			Institute of Archaeology, Chinese Academy of Social Sciences, 1991
Qingdun	Taihu region	Jiangsu	120.254	32.6085	GZ3383	Milu deer bone	4555	40			Ding et al., 2013
Qingdun	Taihu region	Jiangsu	120.254	32.6085	GZ3379	Milu deer bone	4620	35			Ding et al., 2013
Qingdun	Taihu region	Jiangsu	120.254	32.6085	WB78-09	Tree roots	4690	85			Institute of Archaeology, Chinese Academy of Social Sciences.1991
Qingdun	Taihu region	Jiangsu	120.254	32.6085	SH-0016	Wood	4800	75			Institute of Archaeology, Chinese Academy of Social Sciences.1991
Qingdun	Taihu region	Jiangsu	120.254	32.6085	ZK-0582	Charred wood	4870	85			Institute of Archaeology, Chinese Academy of Social Sciences, 1991
Qingdun	Taihu region	Jiangsu	120.254	32.6085	ZK-0583	Wood	4890	80			Institute of Archaeology, Chinese Academy of Social Sciences, 1991
Qingdun	Taihu region	Jiangsu	120.254	32.6085	WB78-07	Charred wood	5180	175			Institute of Archaeology, Chinese Academy of Social Sciences, 1991
Qiucheng	Taihu region	Zhejiang	120.097	30.9399	ZK-0046	Wood	5870	100			Institute of Archaeology, Chinese Academy of Social Sciences, 1991
Qiuwu	Taihu region	Zhejiang	119.97	30.431	BA170912	Charcoal	4285	40			Liu et al., 2017
Qiuwu	Taihu region	Zhejiang	119.97	30.431	BA120596	Leaves	4345	35			Liu et al., 2017
Shiwu	Taihu region	Zhejiang	119.97	30.431	BA170913	Charcoal	4325	30			Liu et al., 2017
Shiwu	Taihu region	Zhejiang	119.97	30.431	BA170914	Charcoal	4350	35			Liu et al., 2017
Shizishan	Taihu region	Zhejiang	119.973	30.406	BA170903	Grasses	4320	30			Liu et al., 2017
Shizishan	Taihu region	Zhejiang	119.973	30.406	BA120586	Bamboo	4345	30			Liu et al., 2017
Sidun	Taihu region	Jiangsu	120.1	31.8167	NB-0030	Charcoal	4150	200			Institute of Archaeology, Chinese Academy of Social Sciences, 1991
Siqian	Taihu region	Shanghai	121.11	31.2	BK91010	Bamboo	4510	70			Radiocarbon laboratory of Peking University, 1996
Siqian	Taihu region	Shanghai	121.11	31.2	BK91013	Wood	4680	70			Radiocarbon laboratory of Peking University, 1996
Siqian	Taihu region	Shanghai	121.11	31.2	BK91012	Charcoal	4765	100			Radiocarbon laboratory of Peking University, 1996
Siqian	Taihu region	Shanghai	121.11	31.2	BK91015	Peat	4865	80	Rejected	Dated on inappropriate materials	Radiocarbon laboratory of Peking University, 1996
Songze	Taihu region	Shanghai	121.168	31.1387	ZK-0437-0	Bones	4500	105			Institute of Archaeology, Chinese Academy of Social Sciences, 1991
Songze	Taihu region	Shanghai	121.168	31.1387	SH-0017	Wood	5000	75			Institute of Archaeology, Chinese Academy of Social Sciences, 1991
Songze	Taihu region	Shanghai	121.168	31.1387	ZK-0438-0	Bones	5080	200			Institute of Archaeology, Chinese Academy of Social Sciences, 1991
Songze	Taihu region	Shanghai	121.168	31.1387	SH-0022	Wood	5150	75			Institute of Archaeology, Chinese Academy of Social Sciences, 1991
Songze	Taihu region	Shanghai	121.168	31.1387	ZK-0055	Wood	5190	105			Institute of Archaeology, Chinese Academy of Social Sciences, 1991
Songze	Taihu region	Shanghai	121.168	31.1387	BK79004	Wood	5240	180			Institute of Archaeology, Chinese Academy of Social Sciences, 1991
Songze	Taihu region	Shanghai	121.168	31.1387	BK79003	Wood	5330	90			Institute of Archaeology, Chinese Academy of Social Sciences, 1991
Tangshan	Taihu region	Zhejiang	119.998	30.4	BA170907	Grasses	4305	30			Liu et al., 2017
Tangshan	Taihu region	Zhejiang	119.998	30.4	BA170906	Grasses	4325	35			Liu et al., 2017
Tinglin	Taihu region	Shanghai	121.311	30.8825	ZK-2272	Human bones	3540	150			Institute of Archaeology, Chinese Academy of Social Sciences, 1991
Tinglin	Taihu region	Shanghai	121.311	30.8825	ZK-0254	Charred wood	3730	95			Institute of Archaeology, Chinese Academy of Social Sciences, 1991
Tinglin	Taihu region	Shanghai	121.311	30.8825	SH-0030	Charred wood	4200	70			Institute of Archaeology, Chinese Academy of Social Sciences, 1991
Wutongnong	Taihu region	Zhejiang	119.973	30.406	BA170909	Grasses	4375	35			Liu et al., 2017
Xudun	Taihu region	Jiangsu	120.056	31.7199	ZK-2171	Wood	4560	240			Institute of Archaeology, Chinese Academy of Social Sciences, 1991
Xudun	Taihu region	Jiangsu	120.056	31.7199	ZK-0315	Wood	4860	120			Institute of Archaeology, Chinese Academy of Social Sciences, 1991
Xudun	Taihu region	Jiangsu	120.056	31.7199	ZK-0316	Wood	4880	120			Institute of Archaeology, Chinese Academy of Social Sciences, 1991
Xudun	Taihu region	Jiangsu	120.056	31.7199	ZK-2170	Shell	4920	65			Institute of Archaeology, Chinese Academy of Social Sciences, 1991
Xudun	Taihu region	Jiangsu	120.056	31.7199	BK76023	Charred wood	5150	110			Institute of Archaeology, Chinese Academy of Social Sciences, 1991
Xudun	Taihu region	Jiangsu	120.056	31.7199	ZK-0716	Charred wood	5330	200			Institute of Archaeology, Chinese Academy of Social Sciences, 1991
Xudun	Taihu region	Jiangsu	120.056	31.7199	ZK-0717	Charred wood	5400	150			Institute of Archaeology, Chinese Academy of Social Sciences, 1991
Yangjia	Taihu region	Jiangsu	120.116	31.5191	BA131756	Charred rice grain	5340	30			Qiu et al., 2016a
Yangjia	Taihu region	Jiangsu	120.116	31.5191	BA131757	Charred rice grain	5265	45			Qiu et al., 2016a
Zhanglingshan	Taihu region	Shanghai	120.9	31.25	ZK-0433	Charred wood	5010	230			Institute of Archaeology, Chinese Academy of Social Sciences, 1991
Zhongjiagang	Taihu region	Zhejiang	120	30.4016	BA 170948	Wood	3740	25			Zhejiang Provincial Institute of Cultural Relics and Archaeology, 2019
Zhongjiagang	Taihu region	Zhejiang	120	30.4016	BA 170949	Wood	3865	25			Zhejiang Provincial Institute of Cultural Relics and Archaeology, 2019
Zhongjiagang	Taihu region	Zhejiang	120	30.4016	BA170947	Wood	3910	25			Zhejiang Provincial Institute of Cultural Relics and Archaeology, 2019
Zhongjiagang	Taihu region	Zhejiang	120	30.4016	BA 170950	Plant	3980	25			Zhejiang Provincial Institute of Cultural Relics and Archaeology, 2019
Zhongjiagang	Taihu region	Zhejiang	120	30.4016	BA 170955	Plant	4010	55			Zhejiang Provincial Institute of Cultural Relics and Archaeology, 2019
Zhongjiagang	Taihu region	Zhejiang	120	30.4016	BA 170956	Fruit kernel	4030	25			Zhejiang Provincial Institute of Cultural Relics and Archaeology, 2019
Zhongjiagang	Taihu region	Zhejiang	120	30.4016	BA 170933	Choerospondias axillaris kernel	4035	30			Zhejiang Provincial Institute of Cultural Relics and Archaeology, 2019
Zhongjiagang	Taihu region	Zhejiang	120	30.4016	BA 170944	Seeds	4040	25			Zhejiang Provincial Institute of Cultural Relics and Archaeology, 2019
Zhongjiagang	Taihu region	Zhejiang	120	30.4016	BA 170931	Peach branchlet	4045	25			Zhejiang Provincial Institute of Cultural Relics and Archaeology, 2019
Zhongjiagang	Taihu region	Zhejiang	120	30.4016	BA 170945	Wood	4045	25			Zhejiang Provincial Institute of Cultural Relics and Archaeology, 2019
Zhongjiagang	Taihu region	Zhejiang	120	30.4016	BA 170943	Seeds	4055	25			Zhejiang Provincial Institute of Cultural Relics and Archaeology, 2019
Zhongjiagang	Taihu region	Zhejiang	120	30.4016	BA 170957	Fruit kernel	4055	30			Zhejiang Provincial Institute of Cultural Relics and Archaeology, 2019
Zhongjiagang	Taihu region	Zhejiang	120	30.4016	BA 170935	Plant	4075	25			Zhejiang Provincial Institute of Cultural Relics and Archaeology, 2019
Zhongjiagang	Taihu region	Zhejiang	120	30.4016	BA 170941	Charred wood	4075	25			Zhejiang Provincial Institute of Cultural Relics and Archaeology, 2019
Zhongjiagang	Taihu region	Zhejiang	120	30.4016	BA 170934	Charred fruit kernel	4080	35			Zhejiang Provincial Institute of Cultural Relics and Archaeology, 2019
Zhongjiagang	Taihu region	Zhejiang	120	30.4016	BA 170942	Plant	4080	25			Zhejiang Provincial Institute of Cultural Relics and Archaeology, 2019
Zhongjiagang	Taihu region	Zhejiang	120	30.4016	BA 170946	Plant	4085	30			Zhejiang Provincial Institute of Cultural Relics and Archaeology, 2019
Zhongjiagang	Taihu region	Zhejiang	120	30.4016	BA 170932	Choerospondias axillaris kernel	4105	25			Zhejiang Provincial Institute of Cultural Relics and Archaeology, 2019
Zhongjiagang	Taihu region	Zhejiang	120	30.4016	TKa-16862	Pig bones	4106	25			Zhejiang Provincial Institute of Cultural Relics and Archaeology, 2019
Zhongjiagang	Taihu region	Zhejiang	120	30.4016	TKa-18124	Human bones	4110	22			Zhejiang Provincial Institute of Cultural Relics and Archaeology, 2019
Zhongjiagang	Taihu region	Zhejiang	120	30.4016	TKa-19509	Human bones	4121	28			Zhejiang Provincial Institute of Cultural Relics and Archaeology, 2019
Zhongjiagang	Taihu region	Zhejiang	120	30.4016	TKa-19796	Human bones	4132	24			Zhejiang Provincial Institute of Cultural Relics and Archaeology, 2019
Zhongjiagang	Taihu region	Zhejiang	120	30.4016	TKa-16860	Pig bones	4139	25			Zhejiang Provincial Institute of Cultural Relics and Archaeology, 2019
Zhongjiagang	Taihu region	Zhejiang	120	30.4016	TKa-16859	Pig bones	4143	26			Zhejiang Provincial Institute of Cultural Relics and Archaeology, 2019
Zhongjiagang	Taihu region	Zhejiang	120	30.4016	TKa-19507	Human bones	4147	28			Zhejiang Provincial Institute of Cultural Relics and Archaeology, 2019
Zhongjiagang	Taihu region	Zhejiang	120	30.4016	TKa-19792	Human bones	4148	25			Zhejiang Provincial Institute of Cultural Relics and Archaeology, 2019
Zhongjiagang	Taihu region	Zhejiang	120	30.4016	TKa-19512	Human bones	4153	28			Zhejiang Provincial Institute of Cultural Relics and Archaeology, 2019
Zhongjiagang	Taihu region	Zhejiang	120	30.4016	TKa-19510	Human bones	4158	28			Zhejiang Provincial Institute of Cultural Relics and Archaeology, 2019
Zhongjiagang	Taihu region	Zhejiang	120	30.4016	TKa-19798	Human bones	4168	26			Zhejiang Provincial Institute of Cultural Relics and Archaeology, 2019
Zhongjiagang	Taihu region	Zhejiang	120	30.4016	TKa-16863	Pig bones	4175	25			Zhejiang Provincial Institute of Cultural Relics and Archaeology, 2019
Zhongjiagang	Taihu region	Zhejiang	120	30.4016	TKa-19794	Human bones	4176	28			Zhejiang Provincial Institute of Cultural Relics and Archaeology, 2019
Zhongjiagang	Taihu region	Zhejiang	120	30.4016	BA 170929	Reeds or bamboo	4180	30			Zhejiang Provincial Institute of Cultural Relics and Archaeology, 2019
Zhongjiagang	Taihu region	Zhejiang	120	30.4016	TKa-19791	Human bones	4181	24			Zhejiang Provincial Institute of Cultural Relics and Archaeology, 2019
Zhongjiagang	Taihu region	Zhejiang	120	30.4016	TKa-19505	Human bones	4189	27			Zhejiang Provincial Institute of Cultural Relics and Archaeology, 2019
Zhongjiagang	Taihu region	Zhejiang	120	30.4016	TKa-19511	Human bones	4191	27			Zhejiang Provincial Institute of Cultural Relics and Archaeology, 2019
Zhongjiagang	Taihu region	Zhejiang	120	30.4016	TKa-19793	Human bones	4191	26			Zhejiang Provincial Institute of Cultural Relics and Archaeology, 2019
Zhongjiagang	Taihu region	Zhejiang	120	30.4016	TKa-19800	Human bones	4195	25			Zhejiang Provincial Institute of Cultural Relics and Archaeology, 2019
Zhongjiagang	Taihu region	Zhejiang	120	30.4016	TKa-19797	Human bones	4196	27			Zhejiang Provincial Institute of Cultural Relics and Archaeology, 2019
Zhongjiagang	Taihu region	Zhejiang	120	30.4016	TKa-19801	Human bones	4199	26			Zhejiang Provincial Institute of Cultural Relics and Archaeology, 2019
Zhongjiagang	Taihu region	Zhejiang	120	30.4016	TKa-16858	Pig bones	4201	26			Zhejiang Provincial Institute of Cultural Relics and Archaeology, 2019
Zhongjiagang	Taihu region	Zhejiang	120	30.4016	TKa-16861	Pig bones	4202	25			Zhejiang Provincial Institute of Cultural Relics and Archaeology, 2019
Zhongjiagang	Taihu region	Zhejiang	120	30.4016	BA 170939	Peach pit	4205	35			Zhejiang Provincial Institute of Cultural Relics and Archaeology, 2019
Zhongjiagang	Taihu region	Zhejiang	120	30.4016	TKa-19795	Human bones	4208	27			Zhejiang Provincial Institute of Cultural Relics and Archaeology, 2019
Zhongjiagang	Taihu region	Zhejiang	120	30.4016	TKa-19790	Human bones	4209	24			Zhejiang Provincial Institute of Cultural Relics and Archaeology, 2019
Zhongjiagang	Taihu region	Zhejiang	120	30.4016	BA 170953	Plant	4225	25			Zhejiang Provincial Institute of Cultural Relics and Archaeology, 2019
Zhongjiagang	Taihu region	Zhejiang	120	30.4016	TKa-19508	Human bones	4228	30			Zhejiang Provincial Institute of Cultural Relics and Archaeology, 2019
Zhongjiagang	Taihu region	Zhejiang	120	30.4016	BA 170937	Choerospondias axillaris kernel	4235	30			Zhejiang Provincial Institute of Cultural Relics and Archaeology, 2019
Zhongjiagang	Taihu region	Zhejiang	120	30.4016	TKa-19506	Human bones	4248	27			Zhejiang Provincial Institute of Cultural Relics and Archaeology, 2019
Zhongjiagang	Taihu region	Zhejiang	120	30.4016	BA 170951	Plant	4285	25			Zhejiang Provincial Institute of Cultural Relics and Archaeology, 2019
Zhongjiagang	Taihu region	Zhejiang	120	30.4016	BA 170938	Fruit kernel	4305	25			Zhejiang Provincial Institute of Cultural Relics and Archaeology, 2019
Zhongjiagang	Taihu region	Zhejiang	120	30.4016	BA 170930	Bamboo	4325	25			Zhejiang Provincial Institute of Cultural Relics and Archaeology, 2019
Zhongjiagang	Taihu region	Zhejiang	120	30.4016	BA 170936	Charred rice	4335	25			Zhejiang Provincial Institute of Cultural Relics and Archaeology, 2019
Zhongjiagang	Taihu region	Zhejiang	120	30.4016	TKa-19789	Human bones	4345	25			Zhejiang Provincial Institute of Cultural Relics and Archaeology, 2019
Zhongjiagang	Taihu region	Zhejiang	120	30.4016	BA 170940	Plant	4360	25			Zhejiang Provincial Institute of Cultural Relics and Archaeology, 2019
Zhongjiagang	Taihu region	Zhejiang	120	30.4016	TKa-19799	Human bones	4408	26			Zhejiang Provincial Institute of Cultural Relics and Archaeology, 2019
Zhongjiagang	Taihu region	Zhejiang	120	30.4016	BA 170952	Plant	6440	35			Zhejiang Provincial Institute of Cultural Relics and Archaeology, 2019
Zhoujiafan	Taihu region	Zhejiang	119.97	30.431	BA120590	Leaves	4110	30			Liu et al., 2017
Zhoujiafan	Taihu region	Zhejiang	119.97	30.431	BA120591	Grasses	4200	30			Liu et al., 2017
Zhoujiafan	Taihu region	Zhejiang	119.97	30.431	BA120592	Bamboo	4270	35			Liu et al., 2017
Zhoujiafan	Taihu region	Zhejiang	119.97	30.431	BA170911	Charcoal	4310	35			Liu et al., 2017
Zhumucun	Taihu region	Jiangsu	120.872	31.3479	BA131753	Charred rice grain	3885	25			Qiu et al., 2016b
Zhumucun	Taihu region	Jiangsu	120.872	31.3479	BA131752	Charred rice grain	4105	20			Qiu et al., 2016b
Zhumucun	Taihu region	Jiangsu	120.872	31.3479	BA131751	Polygonum lapathifolium	4170	20			Qiu et al., 2016b
Zhumucun	Taihu region	Jiangsu	120.872	31.3479	BA131754	Charred rice grain	4305	25			Qiu et al., 2016b
Hehuashan	Jinqu Basin	Zhejiang	119.25	29.04	BA131100	Charcoal	6830	30			Jiang, 2014
Hehuashan	Jinqu Basin	Zhejiang	119.25	29.04	Beta363178	Charcoal	7810	40			Zuo et al., 2017
Hehuashan	Jinqu Basin	Zhejiang	119.25	29.04	BA141703	Charcoal	7875	45			Zhejiang Provincial Institute of Cultural Relics and Archaeology and Pujiang Museum, 2016
Hehuashan	Jinqu Basin	Zhejiang	119.25	29.04	Beta392752	Organic tempered potsherds	8030	30			Qiu et al., 2018
Hehuashan	Jinqu Basin	Zhejiang	119.25	29.04	Beta438409	Phytolith	8040	30	Rejected	Dated on inappropriate materials	Zuo et al., 2017
Hehuashan	Jinqu Basin	Zhejiang	119.25	29.04	Beta363180	Nutshell	8050	40			Zuo et al., 2017
Hehuashan	Jinqu Basin	Zhejiang	119.25	29.04	BA130723	Rice	8085	30			Zhejiang Provincial Institute of Cultural Relics and Archaeology and Pujiang Museum, 2016
Hehuashan	Jinqu Basin	Zhejiang	119.25	29.04	Beta438410	Phytolith	8130	40	Rejected	Dated on inappropriate materials	Zuo et al., 2017
Hehuashan	Jinqu Basin	Zhejiang	119.25	29.04	Beta363179	Charcoal	8170	40			Zuo et al., 2017
Hehuashan	Jinqu Basin	Zhejiang	119.25	29.04	Beta347055	Organic tempered potsherds	9180	40			Qiu et al., 2018
Huxi	Jinqu Basin	Zhejiang	120.02	28.87	Beta438411	Phytolith	7180	40	Rejected	Dated on inappropriate materials	Zuo et al., 2017
Huxi	Jinqu Basin	Zhejiang	120.02	28.87	Beta434202	Phytolith	7310	40	Rejected	Dated on inappropriate materials	Zuo et al., 2017
Huxi	Jinqu Basin	Zhejiang	120.02	28.87	Beta434199	Phytolith	7530	30	Rejected	Dated on inappropriate materials	Zuo et al., 2017
Huxi	Jinqu Basin	Zhejiang	120.02	28.87	Beta358085	Charcoal	7570	50			Zuo et al., 2017
Huxi	Jinqu Basin	Zhejiang	120.02	28.87	BA30140	Charcoal	7605	30			Zheng et al., 2016
Huxi	Jinqu Basin	Zhejiang	120.02	28.87	BA30141	Charcoal	7630	30			Zheng et al., 2016
Huxi	Jinqu Basin	Zhejiang	120.02	28.87	Beta434197	Charcoal	7660	40			Zuo et al., 2017
Huxi	Jinqu Basin	Zhejiang	120.02	28.87	Beta406654	Phytolith	7680	30	Rejected	Dated on inappropriate materials	Zuo et al., 2017
Huxi	Jinqu Basin	Zhejiang	120.02	28.87	Beta358084	Charcoal	7690	40			Zuo et al., 2017
Huxi	Jinqu Basin	Zhejiang	120.02	28.87	BA130708	Rice remains	7730	25			Zhejiang Provincial Institute of Cultural Relics and Archaeology and Pujiang Museum, 2016
Huxi	Jinqu Basin	Zhejiang	120.02	28.87	BA30138	Charcoal	7730	30			Zheng et al., 2016
Huxi	Jinqu Basin	Zhejiang	120.02	28.87	BA30136	Charcoal	7740	30			Zheng et al., 2016
Huxi	Jinqu Basin	Zhejiang	120.02	28.87	BA130713	Seeds, Fruit fragments	7780	30			Zhejiang Provincial Institute of Cultural Relics and Archaeology and Pujiang Museum, 2016
Huxi	Jinqu Basin	Zhejiang	120.02	28.87	Beta434195	Charcoal	7790	40			Zuo et al., 2017
Huxi	Jinqu Basin	Zhejiang	120.02	28.87	BA130716	Seeds, Fruit fragments	7815	30			Zhejiang Provincial Institute of Cultural Relics and Archaeology and Pujiang Museum, 2016
Huxi	Jinqu Basin	Zhejiang	120.02	28.87	Beta407469	Charcoal	7820	30			Zuo et al., 2017
Huxi	Jinqu Basin	Zhejiang	120.02	28.87	BA130714	Rice remains	7850	40			Zhejiang Provincial Institute of Cultural Relics and Archaeology and Pujiang Museum, 2016
Huxi	Jinqu Basin	Zhejiang	120.02	28.87	Beta434200	Phytolith	7870	40	Rejected	Dated on inappropriate materials	Zuo et al., 2017
Huxi	Jinqu Basin	Zhejiang	120.02	28.87	BA30139	Charcoal	7915	45			Zheng et al., 2016
Miaoshan	Jinqu Basin	Zhejiang	120.06	28.92	Beta32519	charcoal	8140	30			Huan, 2018
Miaoshan	Jinqu Basin	Zhejiang	120.06	28.92	Beta32518	charcoal	8200	30			Huan, 2018
Qiaotou	Jinqu Basin	Zhejiang	119.97	29.29	Beta32520	Charcoal	7650	30			Zhejiang Provincial Institute of Cultural Relics and Archaeology and Pujiang Museum, 2016
Qiaotou	Jinqu Basin	Zhejiang	119.97	29.29	Beta32521	Charcoal	7880	30			Zhejiang Provincial Institute of Cultural Relics and Archaeology and Pujiang Museum, 2016
Qiaotou	Jinqu Basin	Zhejiang	119.97	29.29	BA141697	Charcoal	7970	60			Zhejiang Provincial Institute of Cultural Relics and Archaeology and Pujiang Museum, 2016
Qiaotou	Jinqu Basin	Zhejiang	119.97	29.29	BA141694	Charcoal	7985	50			Zhejiang Provincial Institute of Cultural Relics and Archaeology and Pujiang Museum, 2016
Qiaotou	Jinqu Basin	Zhejiang	119.97	29.29	BA141696	Charcoal	8010	40			Zhejiang Provincial Institute of Cultural Relics and Archaeology and Pujiang Museum, 2016
Qiaotou	Jinqu Basin	Zhejiang	119.97	29.29	BA141699	Charcoal	8045	50			Zhejiang Provincial Institute of Cultural Relics and Archaeology and Pujiang Museum, 2016
Qiaotou	Jinqu Basin	Zhejiang	119.97	29.29	BA141695	Charcoal	8090	45			Zhejiang Provincial Institute of Cultural Relics and Archaeology and Pujiang Museum, 2016
Shangshan	Jinqu Basin	Zhejiang	119.97	29.46	BA08309	Pottery sherds with charcoal	6670	40			Jiang, 2014
Shangshan	Jinqu Basin	Zhejiang	119.97	29.46	BA08310	Pottery sherds with charcoal	6895	40			Jiang, 2014
Shangshan	Jinqu Basin	Zhejiang	119.97	29.46	BA08311	Pottery sherds with charcoal	6920	40			Jiang, 2014
Shangshan	Jinqu Basin	Zhejiang	119.97	29.46	Beta434203	Phytolith	7280	40	Rejected	Dated on inappropriate materials	Zuo et al., 2017
Shangshan	Jinqu Basin	Zhejiang	119.97	29.46	BA10280	Pottery sherds	7335	40			Zhejiang Provincial Institute of Cultural Relics and Archaeology and Pujiang Museum, 2016
Shangshan	Jinqu Basin	Zhejiang	119.97	29.46	NZA33763	Pottery sherds with charcoal	7476	45			Zhejiang Provincial Institute of Cultural Relics and Archaeology and Pujiang Museum, 2016
Shangshan	Jinqu Basin	Zhejiang	119.97	29.46	Beta347056	Pottery sherds with charcoal	7830	40			Zhejiang Provincial Institute of Cultural Relics and Archaeology and Pujiang Museum, 2016
Shangshan	Jinqu Basin	Zhejiang	119.97	29.46	Beta344878	Pottery sherds with charcoal	7970	40			Zhejiang Provincial Institute of Cultural Relics and Archaeology and Pujiang Museum, 2016
Shangshan	Jinqu Basin	Zhejiang	119.97	29.46	BA02238	pottery temper	8050	110			Jiang and Liu, 2006
Shangshan	Jinqu Basin	Zhejiang	119.97	29.46	BA06137	Charcoal	8180	35			Zhejiang Provincial Institute of Cultural Relics and Archaeology and Pujiang Museum, 2016
Shangshan	Jinqu Basin	Zhejiang	119.97	29.46	Beta434204	Phytolith	8280	40	Rejected	Dated on inappropriate materials	Zuo et al., 2017
Shangshan	Jinqu Basin	Zhejiang	119.97	29.46	BA02237	pottery temper	8620	160			Jiang and Liu, 2006
Shangshan	Jinqu Basin	Zhejiang	119.97	29.46	BA02235	pottery temper	8740	110			Jiang and Liu, 2006
Shangshan	Jinqu Basin	Zhejiang	119.97	29.46	BA10279	Pottery sherds with charcoal	8800	35			Zhejiang Provincial Institute of Cultural Relics and Archaeology and Pujiang Museum, 2016
Shangshan	Jinqu Basin	Zhejiang	119.97	29.46	BA06136	Pottery sherds with charcoal	8855	40			Zhejiang Provincial Institute of Cultural Relics and Archaeology and Pujiang Museum, 2016
Shangshan	Jinqu Basin	Zhejiang	119.97	29.46	BA10278	Pottery sherds with charcoal	9365	35			Zhejiang Provincial Institute of Cultural Relics and Archaeology and Pujiang Museum, 2016
Shangshan	Jinqu Basin	Zhejiang	119.97	29.46	NZA33800	Pottery sherds with charcoal	9513	45			Zhejiang Provincial Institute of Cultural Relics and Archaeology and Pujiang Museum, 2016
Shangshan	Jinqu Basin	Zhejiang	119.97	29.46	BA02236	pottery temper	9610	40			Jiang and Liu, 2006
Cihu	Ningshao Plain	Zhejiang	121.557	29.8873	ZK-2294	Wood	4640	80			Institute of Archaeology, Chinese Academy of Social Sciences, 1991
Cihu	Ningshao Plain	Zhejiang	121.557	29.8873	ZK-2293	Wood	4650	85			Institute of Archaeology, Chinese Academy of Social Sciences, 1991
Cihu	Ningshao Plain	Zhejiang	121.557	29.8873	ZK-2404	Charred wood	4980	85			Institute of Archaeology, Chinese Academy of Social Sciences, 1991
Fujiashan	Ningshao Plain	Zhejiang	121.418	30.018	BA08330	Water chestnut shell	5640	40			Ding et al., 2013
Fujiashan	Ningshao Plain	Zhejiang	121.418	30.018	BA08332	Black pottery	5895	40			Ding et al., 2013
Fujiashan	Ningshao Plain	Zhejiang	121.418	30.018	GZ4687	Milu subfossil	5895	40			Ding et al., 2013
Fujiashan	Ningshao Plain	Zhejiang	121.418	30.018	GZ4688	Milu subfossil	5915	40			Ding et al., 2013
Fujiashan	Ningshao Plain	Zhejiang	121.418	30.018	Beta496952	Organic-rich mud	6000	30	Rejected	Dated on inappropriate materials	Tang, 2019
Fujiashan	Ningshao Plain	Zhejiang	121.418	30.018	Beta452788	Plant fragments	5630	30			Tang, 2019
Fujiashan	Ningshao Plain	Zhejiang	121.418	30.018	Beta496950	Organic-rich mud	5510	30	Rejected	Dated on inappropriate materials	Tang, 2019
Fujiashan	Ningshao Plain	Zhejiang	121.418	30.018	Beta496951	Organic-rich mud	5120	30	Rejected	Dated on inappropriate materials	Tang, 2019
Hemudu	Ningshao Plain	Zhejiang	121.367	29.9667	Beta291174	Plant fragments	4570	40			Liu et al., 2016
Hemudu	Ningshao Plain	Zhejiang	121.367	29.9667	ZK-0587	Wood	4630	90			Institute of Archaeology, Chinese Academy of Social Sciences, 1991
Hemudu	Ningshao Plain	Zhejiang	121.367	29.9667	BK75058	Wood	4910	100			Institute of Archaeology, Chinese Academy of Social Sciences, 1991
Hemudu	Ningshao Plain	Zhejiang	121.367	29.9667	Beta291176	Organic matter	5050	40	Rejected	Dated on inappropriate materials	Liu et al., 2016
Hemudu	Ningshao Plain	Zhejiang	121.367	29.9667	BK78118	Wood	5060	100			Institute of Archaeology, Chinese Academy of Social Sciences, 1991
Hemudu	Ningshao Plain	Zhejiang	121.367	29.9667	BK78110	Wood	5160	90			Institute of Archaeology, Chinese Academy of Social Sciences, 1991
Hemudu	Ningshao Plain	Zhejiang	121.367	29.9667	ZK-0589	Wood	5210	90			Institute of Archaeology, Chinese Academy of Social Sciences, 1991
Hemudu	Ningshao Plain	Zhejiang	121.367	29.9667	PV-0028	Wood	5170	100			Institute of Archaeology, Chinese Academy of Social Sciences, 1991
Hemudu	Ningshao Plain	Zhejiang	121.367	29.9667	ZK-0588	Wood	5220	95			Institute of Archaeology, Chinese Academy of Social Sciences, 1991
Hemudu	Ningshao Plain	Zhejiang	121.367	29.9667	Beta291177	Charcoal	5250	40			Liu et al., 2016
Hemudu	Ningshao Plain	Zhejiang	121.367	29.9667	Beta291178	Peat	5290	40	Rejected	Dated on inappropriate materials	Liu et al., 2016
Hemudu	Ningshao Plain	Zhejiang	121.367	29.9667	BK78105	Wood	5400	80			Institute of Archaeology, Chinese Academy of Social Sciences, 1991
Hemudu	Ningshao Plain	Zhejiang	121.367	29.9667	BK78106	Wood	5450	80			Institute of Archaeology, Chinese Academy of Social Sciences, 1991
Hemudu	Ningshao Plain	Zhejiang	121.367	29.9667	BK78113	Wood	5450	80			Institute of Archaeology, Chinese Academy of Social Sciences, 1991
Hemudu	Ningshao Plain	Zhejiang	121.367	29.9667	Beta288632	Peat	5580	40	Rejected	Dated on inappropriate materials	Liu et al., 2016
Hemudu	Ningshao Plain	Zhejiang	121.367	29.9667	Beta288631	Peat	5650	40	Rejected	Dated on inappropriate materials	Liu et al., 2016
Hemudu	Ningshao Plain	Zhejiang	121.367	29.9667	BK78103	Twig, Straws, Acorn, Water chestnut	5740	90			Institute of Archaeology, Chinese Academy of Social Sciences, 1991
Hemudu	Ningshao Plain	Zhejiang	121.367	29.9667	BK78115	Wood	5770	85			Institute of Archaeology, Chinese Academy of Social Sciences, 1991
Hemudu	Ningshao Plain	Zhejiang	121.367	29.9667	WB77-01	Wood	5810	100			Institute of Archaeology, Chinese Academy of Social Sciences, 1991
Hemudu	Ningshao Plain	Zhejiang	121.367	29.9667	BK78102	Wood	5870	100			Institute of Archaeology, Chinese Academy of Social Sciences, 1991
Hemudu	Ningshao Plain	Zhejiang	121.367	29.9667	BK78101	Wood	5890	100			Institute of Archaeology, Chinese Academy of Social Sciences, 1991
Hemudu	Ningshao Plain	Zhejiang	121.367	29.9667	ZK-0263	Acorn	5890	120			Institute of Archaeology, Chinese Academy of Social Sciences, 1991
Hemudu	Ningshao Plain	Zhejiang	121.367	29.9667	ZK-0263-2	Charred crops in pottery sherds	5910	100			Institute of Archaeology, Chinese Academy of Social Sciences, 1991
Hemudu	Ningshao Plain	Zhejiang	121.367	29.9667	BK78116	Wood	6020	85			Institute of Archaeology, Chinese Academy of Social Sciences, 1991
Hemudu	Ningshao Plain	Zhejiang	121.367	29.9667	ZK-0590	Wood	6020	85			Institute of Archaeology, Chinese Academy of Social Sciences, 1991
Hemudu	Ningshao Plain	Zhejiang	121.367	29.9667	BK78111	Wood	5880	100			Institute of Archaeology, Chinese Academy of Social Sciences, 1991
Hemudu	Ningshao Plain	Zhejiang	121.367	29.9667	BK78117	Wood	5120	90			Institute of Archaeology, Chinese Academy of Social Sciences, 1991
Hemudu	Ningshao Plain	Zhejiang	121.367	29.9667	BK78119	Wood	6020	100			Institute of Archaeology, Chinese Academy of Social Sciences, 1991
Hemudu	Ningshao Plain	Zhejiang	121.367	29.9667	BK78114	Rice husk	6060	100			Institute of Archaeology, Chinese Academy of Social Sciences, 1991
Hemudu	Ningshao Plain	Zhejiang	121.367	29.9667	BK78109	Rice remains	6080	200			Institute of Archaeology, Chinese Academy of Social Sciences, 1991
Hemudu	Ningshao Plain	Zhejiang	121.367	29.9667	PV-0047	Acorn	6080	130			Institute of Archaeology, Chinese Academy of Social Sciences, 1991
Hemudu	Ningshao Plain	Zhejiang	121.367	29.9667	BK75057	Wood	6130	100			Institute of Archaeology, Chinese Academy of Social Sciences, 1991
Hemudu	Ningshao Plain	Zhejiang	121.367	29.9667	BK78104	Rice remains	6130	170			Institute of Archaeology, Chinese Academy of Social Sciences, 1991
Hemudu	Ningshao Plain	Zhejiang	121.367	29.9667	UGa-32508	Charcoal	5850	35			He et al., 2020b
Hemudu	Ningshao Plain	Zhejiang	121.367	29.9667	Beta456259	Wood	6070	30			He et al., 2020b
Hemudu	Ningshao Plain	Zhejiang	121.367	29.9667	UGa-32509	Charcoal	6190	30			He et al., 2020b
Hemudu	Ningshao Plain	Zhejiang	121.367	29.9667	UGa-32510	Charcoal	6200	30			He et al., 2020b
Hupingshan	Ningshao Plain	Zhejiang	120.544	30.146	Hupingshan	Wood	3863	120			The Zhejiang Provincial Institute of Cultural Relics and Archaeology, 1997
Kuahuqiao	Ningshao Plain	Zhejiang	120.223	30.1427	Pan-1	Unknown	6120	240	Rejected	Dated on unknown materials	Pan, 2011
Kuahuqiao	Ningshao Plain	Zhejiang	120.223	30.1427	BK200169	Wood	6180	90			Pan, 2011
Kuahuqiao	Ningshao Plain	Zhejiang	120.223	30.1427	Innes-1	Bulk organic	6330	190	Rejected	Dated on inappropriate materials	Innes et al., 2009
Kuahuqiao	Ningshao Plain	Zhejiang	120.223	30.1427	Pqn-2	Unknown	6370	230	Rejected	Dated on unknown materials	Pan, 2011
Kuahuqiao	Ningshao Plain	Zhejiang	120.223	30.1427	BK200170	Wood	6375	120			Pan, 2011
Kuahuqiao	Ningshao Plain	Zhejiang	120.223	30.1427	BK200167	Wood	6450	90			Pan, 2011
Kuahuqiao	Ningshao Plain	Zhejiang	120.223	30.1427	HL91023	Wood	6500	176			Pan, 2011
Kuahuqiao	Ningshao Plain	Zhejiang	120.223	30.1427	BA08367	Wood	6515	40			Shu et al., 2010
Kuahuqiao	Ningshao Plain	Zhejiang	120.223	30.1427	BK200165	Wood	6585	90			Pan, 2011
Kuahuqiao	Ningshao Plain	Zhejiang	120.223	30.1427	BK200168	Wood	6615	110			Pan, 2011
Kuahuqiao	Ningshao Plain	Zhejiang	120.223	30.1427	BA05766	Organic fragments	6710	40	Rejected	Dated on inappropriate materials	Innes et al., 2009
Kuahuqiao	Ningshao Plain	Zhejiang	120.223	30.1427	GZ1312	Organic fragments	6710	31	Rejected	Dated on inappropriate materials	Innes et al., 2009
Kuahuqiao	Ningshao Plain	Zhejiang	120.223	30.1427	BA08366	Wood	6715	40			Shu et al., 2010
Kuahuqiao	Ningshao Plain	Zhejiang	120.223	30.1427	GZ1311	Organic fragments	6743	36	Rejected	Dated on inappropriate materials	Innes et al., 2009
Kuahuqiao	Ningshao Plain	Zhejiang	120.223	30.1427	GZ1314	Charcoal	6752	33			Innes et al., 2009
Kuahuqiao	Ningshao Plain	Zhejiang	120.223	30.1427	GZ1315	Leaf	6783	32			Innes et al., 2009
Kuahuqiao	Ningshao Plain	Zhejiang	120.223	30.1427	BA08368	Wood	6795	35			Shu et al., 2010
Kuahuqiao	Ningshao Plain	Zhejiang	120.223	30.1427	BA9906	Acorn	6800	170			Pan, 2011
Kuahuqiao	Ningshao Plain	Zhejiang	120.223	30.1427	BA05767	Organic fragments	6805	35	Rejected	Dated on inappropriate materials	Innes et al., 2009
Kuahuqiao	Ningshao Plain	Zhejiang	120.223	30.1427	GZ1316	Organic fragments	6851	33	Rejected	Dated on inappropriate materials	Innes et al., 2009
Kuahuqiao	Ningshao Plain	Zhejiang	120.223	30.1427	BA05768	Organic fragments	6870	40	Rejected	Dated on inappropriate materials	Innes et al., 2009
Kuahuqiao	Ningshao Plain	Zhejiang	120.223	30.1427	HL91026	Wood	6870	210			Pan, 2011
Kuahuqiao	Ningshao Plain	Zhejiang	120.223	30.1427	BA08365	Wood	6925	45			Shu et al., 2010
Kuahuqiao	Ningshao Plain	Zhejiang	120.223	30.1427	BK200166	Wood	6970	100			Pan, 2011
Kuahuqiao	Ningshao Plain	Zhejiang	120.223	30.1427	ZK-3173	Wood	6991	50			Institute of Archaeology, Chinese Academy of Social Sciences, 2004
Kuahuqiao	Ningshao Plain	Zhejiang	120.223	30.1427	GZ1317	Organic fragments	6996	33	Rejected	Dated on inappropriate materials	Innes et al., 2009
Kuahuqiao	Ningshao Plain	Zhejiang	120.223	30.1427	BK2003007	Wood	7055	90			Pan, 2011
Kuahuqiao	Ningshao Plain	Zhejiang	120.223	30.1427	BK2003006	Canoe	7070	155			Pan, 2011
Kuahuqiao	Ningshao Plain	Zhejiang	120.223	30.1427	HL91001	Acorn	7076	155			Pan, 2011
Kuahuqiao	Ningshao Plain	Zhejiang	120.223	30.1427	BA08364	Wood	7370	45			Shu et al., 2010
Kuahuqiao	Ningshao Plain	Zhejiang	120.223	30.1427	HL91002	Wood	7595	242			Pan, 2011
Loujiaqiao	Ningshao Plain	Zhejiang	120.236	29.944	BK2002	Wood	5530	70			Zhejiang Provincial Institute of Cultural Relics and Archaeology et al., 2010
Loujiaqiao	Ningshao Plain	Zhejiang	120.236	29.944	BK2001	Wood	5770	80			Zhejiang Provincial Institute of Cultural Relics and Archaeology et al., 2010
Lujiaqiao	Ningshao Plain	Zhejiang	121.392	29.8168	Beta496949	Plant fragments	5700	30			Tang, 2019
Lujiaqiao	Ningshao Plain	Zhejiang	121.392	29.8168	Beta496948	Plant fragments	5610	30			Tang, 2019
Lujiaqiao	Ningshao Plain	Zhejiang	121.392	29.8168	Beta500184	Organic-rich mud	5180	30	Rejected	Dated on inappropriate materials	Tang, 2019
Lujiaqiao	Ningshao Plain	Zhejiang	121.392	29.8168	Beta496945	Charcoal	5070	30			Tang, 2019
Mingshanhou	Ningshao Plain	Zhejiang	121.463	29.6988	HL91012	charcoal	4786	226			Liu and Wang, 1993
Tianluoshan	Ningshao Plain	Zhejiang	121.385	30.0219	BA07762	Plant remains	3760	40			Zheng et al., 2009
Tianluoshan	Ningshao Plain	Zhejiang	121.385	30.0219	Poz66934	Seeds	3810	70			Li et al., 2018
Tianluoshan	Ningshao Plain	Zhejiang	121.385	30.0219	BA398100	Seeds	3830	30			Li et al., 2018
Tianluoshan	Ningshao Plain	Zhejiang	121.385	30.0219	Poz70204	Plant remains	3840	50			Li et al., 2018
Tianluoshan	Ningshao Plain	Zhejiang	121.385	30.0219	Poz69036	Seeds	3890	35			Li et al., 2018
Tianluoshan	Ningshao Plain	Zhejiang	121.385	30.0219	BA398102	Plant remains	3970	30			Li et al., 2018
Tianluoshan	Ningshao Plain	Zhejiang	121.385	30.0219	Poz69037	Plant remains	4000	70			Li et al., 2018
Tianluoshan	Ningshao Plain	Zhejiang	121.385	30.0219	BA07761	Yagara bulrush seeds	4015	45			Zheng et al., 2009
Tianluoshan	Ningshao Plain	Zhejiang	121.385	30.0219	BA091045	Plant seeds	4020	40	Rejected	Weak association with human occupation	Zheng et al., 2012
Tianluoshan	Ningshao Plain	Zhejiang	121.385	30.0219	BA07760	Bulrush seeds	4195	70			Zheng et al., 2009
Tianluoshan	Ningshao Plain	Zhejiang	121.385	30.0219	BA08359	Bulrush seeds	4250	40			Zheng et al., 2009
Tianluoshan	Ningshao Plain	Zhejiang	121.385	30.0219	BA091046	Plant seeds	4275	40	Rejected	Weak association with human occupation	Zheng et al., 2012
Tianluoshan	Ningshao Plain	Zhejiang	121.385	30.0219	BA08202	Garden sorrel	4385	40			Pan, 2011
Tianluoshan	Ningshao Plain	Zhejiang	121.385	30.0219	BA07759	Bulrush seeds	4460	35			Pan, 2011
Tianluoshan	Ningshao Plain	Zhejiang	121.385	30.0219	BA08203	Bulrush seeds	4470	45			Zheng et al., 2009
Tianluoshan	Ningshao Plain	Zhejiang	121.385	30.0219	BA08355	Bulrush seeds	4475	35			Zheng et al., 2009
Tianluoshan	Ningshao Plain	Zhejiang	121.385	30.0219	BA08526	Bulrush seeds	4490	40			Zheng et al., 2009
Tianluoshan	Ningshao Plain	Zhejiang	121.385	30.0219	BA091047	Plant seeds	4585	35			Zheng et al., 2012
Tianluoshan	Ningshao Plain	Zhejiang	121.385	30.0219	BA091048	Plant seeds	4660	40			Zheng et al., 2012
Tianluoshan	Ningshao Plain	Zhejiang	121.385	30.0219	BA08360	Bulrush seeds	4705	40			Zheng et al., 2009
Tianluoshan	Ningshao Plain	Zhejiang	121.385	30.0219	BA07758	Yagara bulrush seeds	4765	35			Zheng et al., 2009
Tianluoshan	Ningshao Plain	Zhejiang	121.385	30.0219	BA08895	Yagara bulrush seeds	4830	35			Zheng et al., 2009
Tianluoshan	Ningshao Plain	Zhejiang	121.385	30.0219	BA08894	Yagara bulrush seeds	4965	35			Zheng et al., 2009
Tianluoshan	Ningshao Plain	Zhejiang	121.385	30.0219	BA08893	Yagara bulrush seeds	5040	40			Zheng et al., 2009
Tianluoshan	Ningshao Plain	Zhejiang	121.385	30.0219	BK2004028	Charred wood	5081	66			Pan, 2011
Tianluoshan	Ningshao Plain	Zhejiang	121.385	30.0219	BA06596	Acorn	5300	40			Li et al., 2010
Tianluoshan	Ningshao Plain	Zhejiang	121.385	30.0219	BA08204	Garden sorrel	5430	40			Pan, 2011
Tianluoshan	Ningshao Plain	Zhejiang	121.385	30.0219	BA091049	Plant seeds	5465	45			Zheng et al., 2012
Tianluoshan	Ningshao Plain	Zhejiang	121.385	30.0219	BA08207	Sedge seeds	5520	40			Pan, 2011
Tianluoshan	Ningshao Plain	Zhejiang	121.385	30.0219	BA08205	Reed	5580	40			Pan, 2011
Tianluoshan	Ningshao Plain	Zhejiang	121.385	30.0219	BA08206	Reed	5580	40			Pan, 2011
Tianluoshan	Ningshao Plain	Zhejiang	121.385	30.0219	BA091050	Plant seeds	5620	35	Rejected	Weak association with human occupation	Zheng et al., 2012
Tianluoshan	Ningshao Plain	Zhejiang	121.385	30.0219	BA08527	Triangular Bulrush seeds	5725	40			Zheng et al., 2009
Tianluoshan	Ningshao Plain	Zhejiang	121.385	30.0219	BA07764	Flatdstalk bulrush	5785	60			Zheng et al., 2009
Tianluoshan	Ningshao Plain	Zhejiang	121.385	30.0219	BA06595	Rice	5790	40			Li et al., 2010
Tianluoshan	Ningshao Plain	Zhejiang	121.385	30.0219	BA06592	Water chestnut	5840	40			Li et al., 2010
Tianluoshan	Ningshao Plain	Zhejiang	121.385	30.0219	BA04536	Twig	5890	30			Li et al., 2010
Tianluoshan	Ningshao Plain	Zhejiang	121.385	30.0219	BA06593	Water chestnut	5985	40			Pan, 2011
Tianluoshan	Ningshao Plain	Zhejiang	121.385	30.0219	BA06594	Euryale ferox	5990	40			Pan, 2011
Tianluoshan	Ningshao Plain	Zhejiang	121.385	30.0219	BA07763	Flatdstalk bulrush	6045	45			Zheng et al., 2009
Tianluoshan	Ningshao Plain	Zhejiang	121.385	30.0219	BA091051	Plant seeds	6120	45			Zheng et al., 2012
Tianluoshan	Ningshao Plain	Zhejiang	121.385	30.0219	BK2004027	Charcoal	6711	90			Pan, 2011
Tianluoshan	Ningshao Plain	Zhejiang	121.385	30.0219	BK2004030	Charcoal	6949	73			Pan, 2011
Tianluoshan	Ningshao Plain	Zhejiang	121.385	30.0219	BK2004029	Charcoal	6362	117			Pan, 2011
Wuguishan	Ningshao Plain	Zhejiang	121.55	30.0333	Beta496941	Charred plant fragments	4110	30			Huang et al., 2020
Wuguishan	Ningshao Plain	Zhejiang	121.55	30.0333	Beta496942	Charcoal	5080	30			Huang et al., 2020
Xiangjiashan	Ningshao Plain	Zhejiang	121.372	29.98	ZK-2821	Charred wood	5303	89			Pan, 2011
Xiangjiashan	Ningshao Plain	Zhejiang	121.372	29.98	ZK-2822	Wood	5369	95			Pan, 2011
Xiaodongmen	Ningshao Plain	Zhejiang	121.457	29.9823	ZK-2818	Wood	4573	92			Pan, 2011
Xiaodongmen	Ningshao Plain	Zhejiang	121.457	29.9823	ZK-2817	Wood	4583	92			Pan, 2011
Xiasun	Ningshao Plain	Zhejiang	120.23	30.17	ZK-3174	Wood	6886	65			Institute of Archaeology, Chinese Academy of Social Sciences, 2004
Xiasun	Ningshao Plain	Zhejiang	120.23	30.17	ZK-3172	Wood	6919	46			Institute of Archaeology, Chinese Academy of Social Sciences, 2004
Xiawangdu	Ningshao Plain	Zhejiang	121.448	29.7736	Uga-32514	Charcoal	4420	30			He et al., 2020a
Xiawangdu	Ningshao Plain	Zhejiang	121.448	29.7736	Uga-38688	Rice seed	4460	20			He et al., 2020a
Xiawangdu	Ningshao Plain	Zhejiang	121.448	29.7736	Uga-32515	Rice seed	4570	30			He et al., 2020a
Xiawangdu	Ningshao Plain	Zhejiang	121.448	29.7736	Uga-38687	Rice seed	4650	20			He et al., 2020a
Xiawangdu	Ningshao Plain	Zhejiang	121.448	29.7736	Uga-38686	Rice seed	4760	20			He et al., 2020a
Xiawangdu	Ningshao Plain	Zhejiang	121.448	29.7736	Uga-32517	Rice seed	4850	30			He et al., 2020a
Yushan	Ningshao Plain	Zhejiang	121.55	30.033	BA484779	Seeds	3030	30	Rejected	Out of Neolithic	Zheng et al., 2019
Yushan	Ningshao Plain	Zhejiang	121.55	30.033	YS406455	Plant fragments	4170	30			Wang et al., 2018
Yushan	Ningshao Plain	Zhejiang	121.55	30.033	BA151805	Seeds	4300	25			He et al., 2018
Yushan	Ningshao Plain	Zhejiang	121.55	30.033	BA151806	Seeds	4525	25			He et al., 2018
Yushan	Ningshao Plain	Zhejiang	121.55	30.033	YS414778	Organic matter	4770	30	Rejected	Dated on inappropriate materials	Wang et al., 2018
Yushan	Ningshao Plain	Zhejiang	121.55	30.033	YS414779	Charcoal	5210	30			Wang et al., 2018
Yushan	Ningshao Plain	Zhejiang	121.55	30.033	BA484777	Seeds	5240	30			Zheng et al., 2019
Yushan	Ningshao Plain	Zhejiang	121.55	30.033	BA484778	Seeds	5280	30			Zheng et al., 2019
Yushan	Ningshao Plain	Zhejiang	121.55	30.033	BA151808	Seeds	5495	25			He et al., 2018
Yushan	Ningshao Plain	Zhejiang	121.55	30.033	YS406457	Charcoal	5640	30			Wang et al., 2018
Yushan	Ningshao Plain	Zhejiang	121.55	30.033	BA151809	Seeds	5665	25			He et al., 2018
Yushan	Ningshao Plain	Zhejiang	121.55	30.033	BA151810	Seeds	5860	25			He et al., 2018
Yushan	Ningshao Plain	Zhejiang	121.55	30.033	BA484776	Seeds	6030	30			Zheng et al., 2019

## Sheet: References
References
Cao, Z., Yang, L., Lin, X., Hu, Z., Dong, Y., Zhang, G., et al. (2007). Morphological characteristics of paddy fields, paddy soil profile, phytolith and fossil rice grain of the Neolithic age in Yangtze River Delta. Acta. Pedol. Sin. 44, 838-847 (in Chinese).
Cultural Relics and Archaeology Institute of Zhejiang Province, Huzhou Museum (2014). Qiangshanyang A report on the third and fourth excavations of the site. Beijing: Cultural Relics Press (in Chinese).
Ding, X., Shen, C., Ding, P., Yi, W., Fu, D., and Liu, K. (2013). New radiocarbon dates for Milu (Elaphurus davidianus) sub-fossils from southeast China. Nucl. Instrum. Methods Phys. Res., Sect. B 294, 627-630.
Gao, Y. (2012). Sporppollen analysis and environmental archaeology study on Site Jiangli, Kunshan, Jiangsu Province. [dissertation/master’s thesis]. [Nanjing]: Nanjing Normal University (in Chinese).
He, K., Lu, H., Li, Y., Ding, F., Zhang, J., and Wang, C. (2020a). Cultural response to Middle Holocene sea-level fluctuations in eastern China: a multi-proxy approach. Boreas 49, 71-88.
He, K., Lu, H., Zheng, H., Yang, Q., Sun, G., Zheng, Y., et al. (2020b). Role of dynamic environmental change in sustaining the protracted process of rice domestication in the lower Yangtze River. Quat. Sci. Rev. 242, 106456.
He, K., Lu, H., Zheng, Y., Zhang, J., Xu, D., Huan, X., et al. (2018). Middle-Holocene sea-level fluctuations interrupted the developing Hemudu culture in the lower Yangtze River, China. Quat. Sci. Rev. 188, 90-103.
Huan, X. (2018). Phytolith research on modern paddy soil and early Holocene rice domestication in the Lower Yangtze. [dissertation/doctor’s thesis]. [Beijing]: Institute of Geology and Geophysics, Chinese Academy of Sciences (in Chinese).
Huang, J., Lei, S., Tang, L., Wang, A., and Wang, Z. (2020). Mid-Holocene environmental change and human response at the Neolithic Wuguishan site in the Ningbo coastal lowland of East China. Holocene 30, 1591-1605.
Innes, J. B., Zong, Y., Chen, Z., Chen, C., Wang, Z., and Wang, H. (2009). Environmental history, palaeoecology and human activity at the early Neolithic forager/cultivator site at Kuahuqiao, Hangzhou, eastern China. Quat. Sci. Rev. 28, 2277-2294.
Institute of Archaeology, Chinese Academy of Social Sciences (1991). Radiocarbon dates in Chinese Archaeology (1965-1991). Beijing: Cultural Relics Press (in Chinese).
Institute of Archaeology, Chinese Academy of Social Sciences (1995). Report of 14C dates(ⅩⅩⅡ). Kaogu(Archaeology) 7, 655-659 (in Chinese).
Institute of Archaeology, Chinese Academy of Social Sciences (1996). Report of 14C dates(ⅩⅩⅢ). Kaogu(Archaeology) 7, 66-70 (in Chinese).
Institute of Archaeology, Chinese Academy of Social Sciences (1999). Report of 14C dates (ⅩⅩⅤ). Kaogu(Archaeology) 7, 80-83 (in Chinese).
Institute of Archaeology, Chinese Academy of Social Sciences (2000). Report of 14C dates (ⅩⅩⅥ). Kaogu (Archaeology) 7, 70-74 (in Chinese).
Institute of Archaeology, Chinese Academy of Social Sciences (2003). Report of 14C dates (ⅩⅩⅨ). Kaogu (Archaeology) 7, 64-68 (in Chinese).
Institute of Archaeology, Chinese Academy of Social Sciences (2004). Report of 14C dates (ⅩⅩⅩ). Kaogu(Archaeology) 7, 66-71 (in Chinese).
Institute of Archaeology, Chinese Academy of Social Sciences (2009). Report of 14C dates (ⅩⅩⅩⅤ). Kaogu (Archaeology) 7, 64-67 (in Chinese).
Institute of Archaeology, Chinese Academy of Social Sciences and Institute of Earth Environment, Chinese Academy of Sciences (2011). Report of 14C dates (ⅩⅩⅩⅦ). Kaogu(Archaeology) 7, 65-67 (in Chinese).
Jiang, L (2014). Study on Kuahuqiao Culture. Beijing: Science Press (in Chinese).
Jiang, L., and Liu, L. (2006). New evidence for the origins of sedentism and rice domestication in the Lower Yangzi River, China. Antiquity 80, 355-361.
Jin, Y., Mo, D., Li, Y., Ding, P., Zong, Y., and Zhuang, Y. (2019). Ecology and hydrology of early rice farming: geoarchaeological and palaeo-ecological evidence from the Late Holocene paddy field site at Maoshan, the Lower Yangtze. Archaeol. Anthrop. Sci. 11, 1851-1863.
Li, C., Li, Y., Zheng, Y., Yu, S., Tang, L., Li, B., et al. (2018). A high-resolution pollen record from East China reveals large climate variability near the Northgrippian-Meghalayan boundary (around 4200 years ago) exerted societal influence. Palaeogeogr., Palaeoclimatol., Palaeoecol. 512, 156-165.
Li, L. (2011). Research on the environmental evolution and the missing reasons of the archaeological sites in early Holocene in Taihu Lake area. [dissertation/doctor’s thesis]. [Nanjing]: Nanjing University (in Chinese).
Li, L., Zhu, C., Lin, L., Zhao, Q., Shi, G., and Zhu, H. (2008). Transgression records between 7500-5400BC on the stratum of the Luotuodun Site in Yixing, Jiangsu Province. Acta Geogr. Sin. 63, 1189-1197 (in Chinese).
Li, M., Mo, D., Mao, L., Sun, G., and Zhou, K. (2010). Paleosalinity in the Tianluoshan site and the correlation between the Hemudu culture and its environmental background. J. Geogr. Sci. 20, 441-454.
Liu, B., Wang, N., Chen, M., Wu, X., Mo, D., Liu, J., et al. (2017). Earliest hydraulic enterprise in China, 5,100 years ago. Proc. Natl Acad. Sci. U. S. A. 114, 13637-13642.
Liu, J., and Wang, H. (1993). First exploration on Liangzhu Culture, Ningshao Plain. Southeast Culture 1, 92-102 (in Chinese).
Liu, Y., Sun, Q., Fan, D., Lai, X., Xu, L., Finlayson, B., et al. (2016). Pollen evidence to interpret the history of rice farming at the Hemudu site on the Ningshao coast, eastern China. Quat. Int. 426, 195-203.
Liu, Y., Sun, Q., Thomas, I., Zhang, L., Finlayson, B., Zhang, W., et al. (2015). Middle Holocene coastal environment and the rise of the Liangzhu City complex on the Yangtze delta, China. Quat. Res. 84, 326-334.
Pan, Y. (2011). Resource production in the Yangzi delta and Qiantang drainage from 10000 to 6000 BP: A palaeoethnobotanical and human ecological investigation. [dissertation/doctor’s thesis]. [Shanghai]: Fudan University (in Chinese).
Qiu, Z., Jiang, H., Ding, J., Hu, Y., and Shang, X. (2014). Pollen and phytolith evidence for rice cultivation and vegetation change during the Mid-Late Holocene at the Jiangli Site, Suzhou, East China. PLoS One 9, e86816.
Qiu, Z., Jiang, L., Wang, C., Hill, D.V., and Wu, Y. (2018). New evidence for rice cultivation from the Early Neolithic Hehuashan site. Archaeol. Anthropol. Sci. 11, 1259–1272.
Qiu, Z., Liu, B., Li, Y., Shang, X., and Jiang, H. (2016a). Analysis of plant remains at the Neolithic Yangjia Site, Wuxi City, Jiangsu Province (East China). Sci. China-Earth Sci. 59, 1803.
Qiu, Z., Shang, X., Ferguson, D.K., and Jiang, H. (2016b). Archaeobotanical analysis of diverse plant food resources and palaeovegetation at the Zhumucun site, a late Neolithic settlement of the Liangzhu Culture in east China. Quat. Int. 426, 75-85.
Radiocarbon laboratory of Peking University (1996). Report of 14C dates (Ⅹ). Wenwu 6, 91-95 (in Chinese).
Shanghai Museum (2014). Proceedings on the excavation at Guang Fu Lin. Shanghai: Shanghai Classics Publishing House (in Chinese).
Shu, J., Wang, W., Jiang, L., and Takahara, H. (2010). Early Neolithic vegetation history, fire regime and human activity at Kuahuqiao, Lower Yangtze River, East China: New and improved insight. Quat. Int. 227, 10-21.
Suzhou Museum (2001). Excavation of Site Guangfucun in Wujiang, Jiangsu Province. Wenwu 3, 41-51 (in Chinese).
Tang, L., Shu, J., Chen, J., and Wang, Z. (2019). Mid- to late Holocene vegetation change recorded at a Neolithic site in the Yangtze coastal plain, East China. Quat. Int. 519, 122-130.
Tang, L. (2019). Middle Holocene seawater intrusion and human's rapid response in the Yaojiang-Ningbo coastal plain, east China. [dissertation/doctor’s thesis]. [Shanghai]: East China Normal University (in Chinese).
The Zhejiang Provincial Institute of Cultural Relics and Archaeology (1997). Journal of the Zhejiang Provincial Institute of Cultural Relics and Archaeology. Beijing: "Long March" Publishing House (in Chinese).
Wang, X., Mo, D., Li, C., Yu, S. Y., Xue, B., Liu, B., et al. (2017). Environmental changes and human activities at a fortified site of the Liangzhu culture in eastern China: Evidence from pollen and charcoal records. Quat. Int. 438, 189-197.
Wang, Z., Ryves, D. B., Lei, S., Nian, X., Lv, Y., Tang, L., et al. (2018). Middle Holocene marine flooding and human response in the south Yangtze coastal plain, East China. Quat. Sci. Rev. 187, 80-93.
Yuan, S., Chen, T., Hu, Y., Meng, Q., and Ma, L. (1994). Report of 14C dates (Ⅸ). Wenwu 4, 89-95 (in Chinese).
Zhejiang Provincial Institute of Cultural Relics and Archaeology (2019). A comprehensive study of Liangzhu ancient city. Beijing: Cultural Relics Press (in Chinese).
Zhejiang Provincial Institute of Cultural Relics and Archaeology and Pujiang Museum (2016). Pujiang Shangshan. Beijing: Cultural Relics Press (in Chinese).
Zhejiang Provincial Institute of Cultural Relics and Archaeology, Zhuji Museum and Pujiang Museum (2010). Lou Jia Qiao, Kuo Tang Shan Bei, Jian Shan Wan. Beijing: Cultural Relics Publishing House (in Chinese).
Zheng, X., Lei, S., Wang, J., and Zhao, Z. (2019). Analysis of flotation results from the Yushan Site in Ningbo City. Agricultural Archaeology 6, 21-27 (in Chinese).
Zheng, Y., Crawford, G. W., Jiang, L.,and Chen, X. (2016). Rice domestication revealed by reduced shattering of archaeological rice from the Lower Yangtze valley. Sci. Rep. 6, 28136.
Zheng, Y., Sun, G., and Chen, X. (2012). Response of rice cultivation to fluctuating sea level during the Mid-Holocene. Chin. Sci. Bull. 57, 370–378.
Zheng, Y., Sun, G., Qin, L., Li, C., Wu, X., and Chen, X. (2009). Rice fields and modes of rice cultivation between 5000 and 2500 BC in east China. J. Archaeol. Sci. 36, 2609-2616.
Zuo, X., Lu, H., Jiang, L., Zhang, J., Yang, X., Huan, X., et al. (2017). Dating rice remains through phytolith carbon-14 study reveals domestication at the beginning of the Holocene. Proc. Natl Acad. Sci. U. S. A. 114, 6486-6491.
